# Supplementary material
Source: PubMed Central journal article supplement (PMC2878742)
Supplement: NIHMS195881-supplement-5_si_005.pdf [file NIHMS195881-supplement-5_si_005.pdf]

## Supporting Information

### **Dolabellane-Type Diterpenoids with Antiprotozoan Activity from a Southwestern Caribbean Gorgonian Octocoral of the Genus *Eunicea***

Xiaomei Wei, Abimael D. Rodríguez\*, Peter Baran and Raphael G. Raptis

Department of Chemistry, University of Puerto Rico, P.O. Box 23346, U. P. R. Station, San Juan, PR 00931-3346

| <b>Table of Contents</b>                                                                         | <b>Page</b> |
|--------------------------------------------------------------------------------------------------|-------------|
| (a) NMR ( $^1\text{H}$ and $^{13}\text{C}$ ) spectra for dolabellanone <b>1</b>                  | 2–3         |
| (b) NMR ( $^1\text{H}$ and HMQC) spectra for dolabellanone <b>2</b>                              | 4–5         |
| (c) NMR ( $^1\text{H}$ and $^{13}\text{C}$ ) spectra for dolabellanone <b>3</b>                  | 6–7         |
| (d) NMR ( $^{13}\text{C}$ and HMQC) spectra for dolabellanone <b>4</b>                           | 8–9         |
| (e) NMR ( $^1\text{H}$ and $^{13}\text{C}$ ) spectra for dolabellanone <b>5</b>                  | 10–11       |
| (f) NMR ( $^1\text{H}$ and $^{13}\text{C}$ ) spectra for dolabellanone <b>6</b>                  | 12–13       |
| (g) NMR ( $^1\text{H}$ and $^{13}\text{C}$ ) spectra for dolabellanone <b>7</b>                  | 14–15       |
| (h) NMR ( $^1\text{H}$ and $^{13}\text{C}$ ) spectra for dolabellanone <b>8</b>                  | 16–17       |
| (i) NMR ( $^1\text{H}$ and $^{13}\text{C}$ ) spectra for dolabellanone <b>9</b>                  | 18–19       |
| (j) NMR ( $^1\text{H}$ and $^1\text{H}$ – $^1\text{H}$ COSY) spectra for dolabellanone <b>10</b> | 20–21       |
| (k) Photograph of the voucher specimen <i>Eunicea</i> sp.2                                       | 22          |

Current Data Parameters  
 NAME Esp20h200a9-3  
 EXPNO 1  
 PROCNO 1

F2 - Acquisition Parameters  
 Date\_ 20020816  
 Time 20.53  
 INSTRUM gpc300  
 PROBHD 5 mm Multinu  
 PULPROG zg30  
 TD 32768  
 SOLVENT CDCl3  
 NS 16  
 DS 2  
 SWH 4058.442 Hz  
 FIDRES 0.123854 Hz  
 AQ 4.0370674 sec  
 RG 574.7  
 DW 123.200 usec  
 DE 5.00 usec  
 TE 300.0 K  
 D1 1.00000000 sec  
 P1 11.00 usec  
 DE 5.00 usec  
 SF01 300.1315818 MHz  
 NUC1 1H  
 PL1 -4.00 dB

F2 - Processing parameters  
 SI 16384  
 SF 300.1300062 MHz  
 EM EM  
 WDW 0  
 SSB 0  
 LB 0.30 Hz  
 GB 0  
 PC 1.00

1D NMR plot parameters  
 CX 20.00 cm  
 F1P 7.381 ppm  
 F1 2215.25 Hz  
 F2P 0.536 ppm  
 F2 160.80 Hz  
 PPMCM 0.34226 ppm/cm  
 HZCM 102.72213 Hz/cm

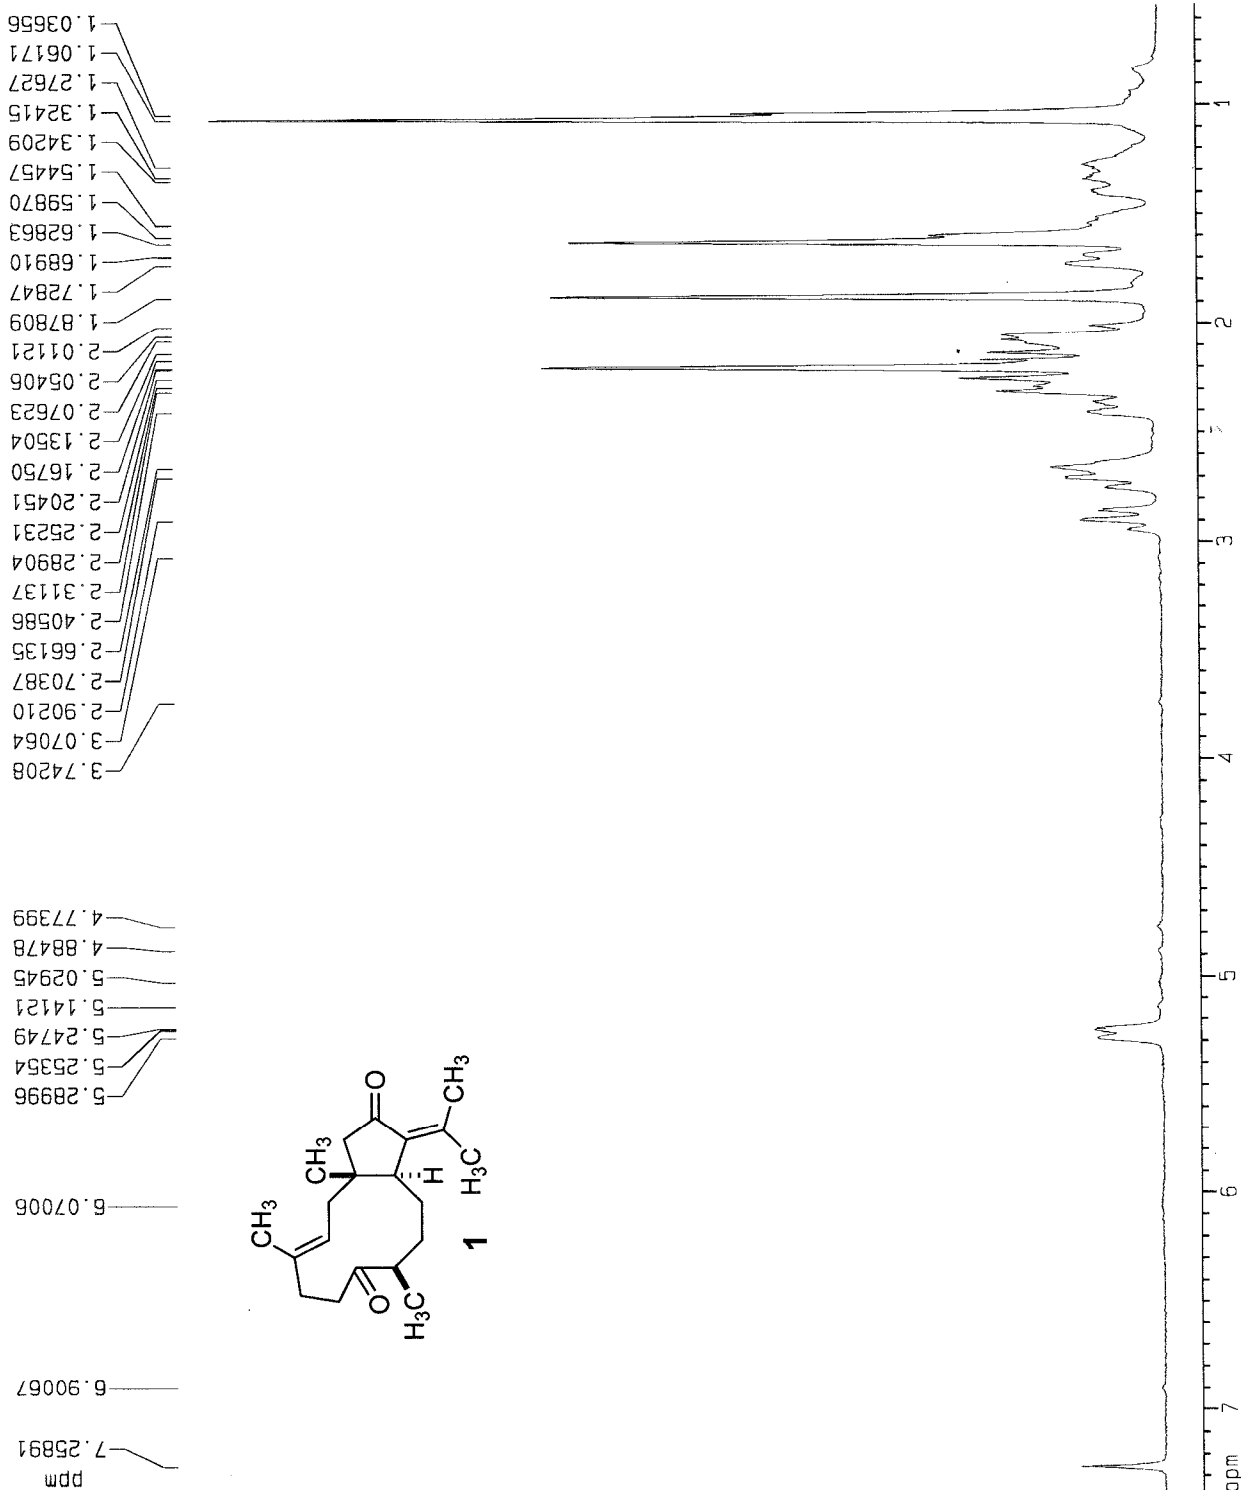

rpar: C13CPD

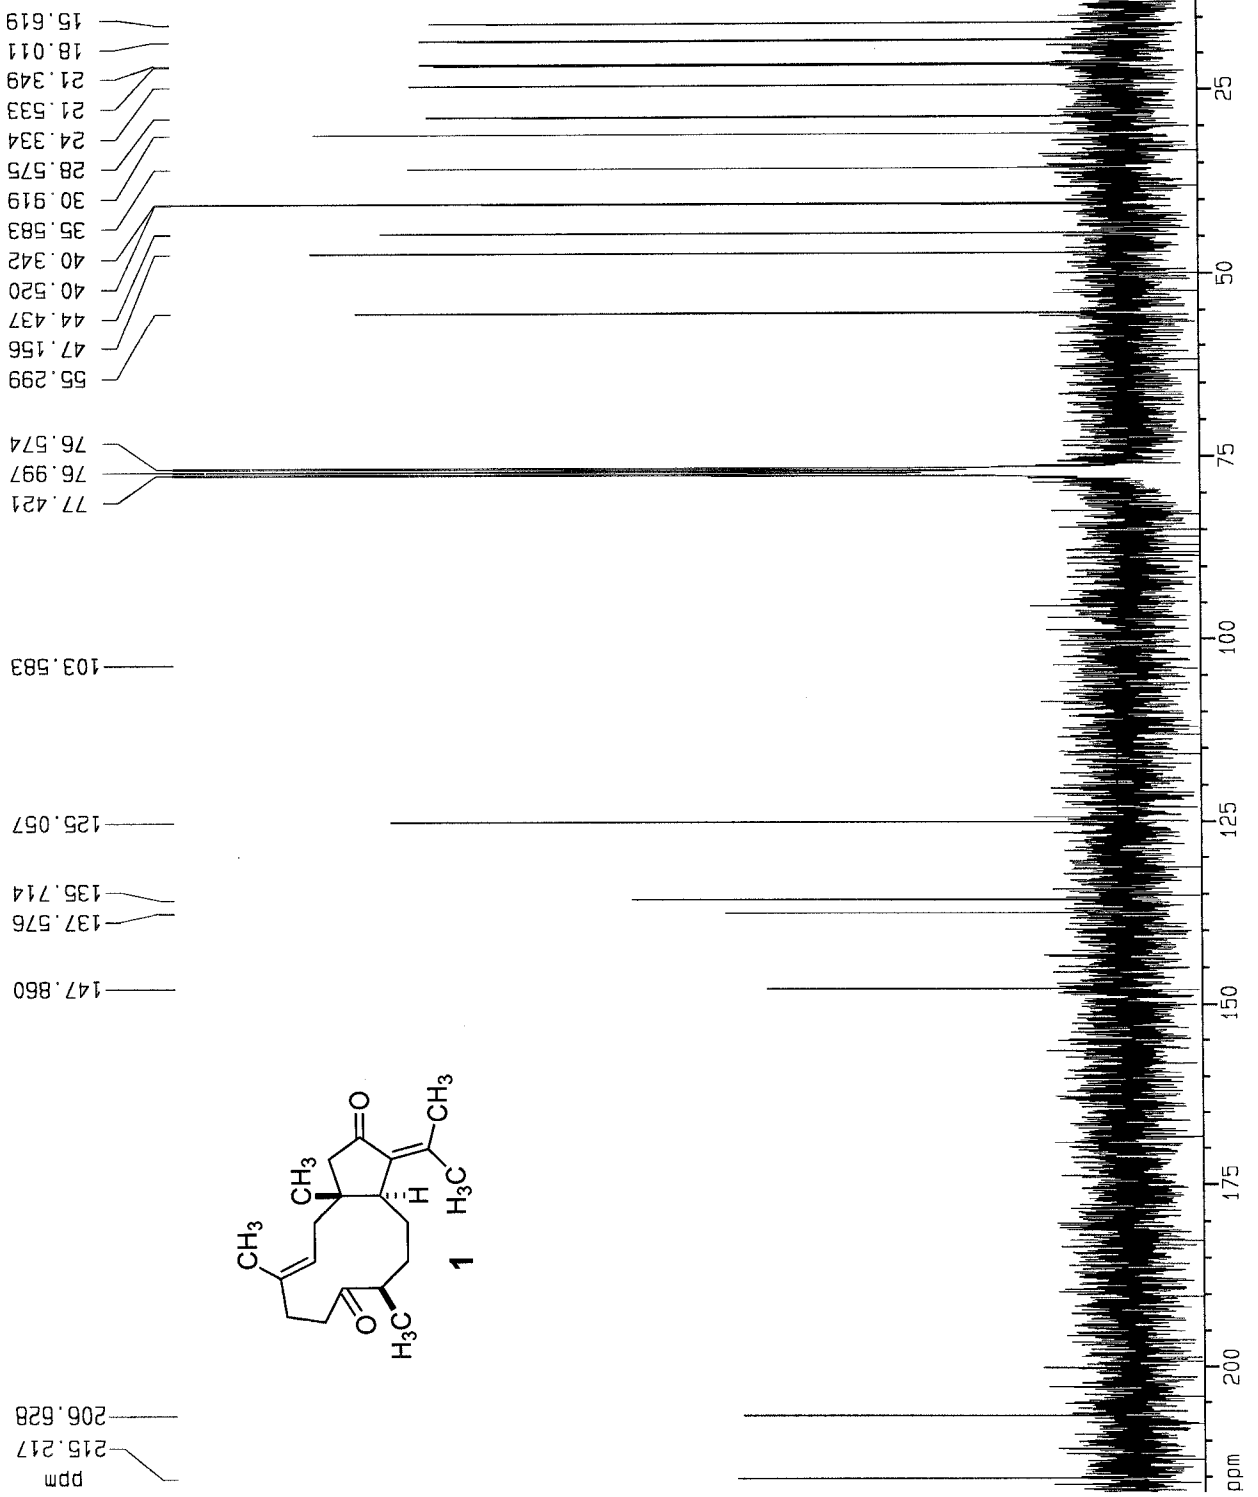

Current Data Parameters  
NAME Esp2bn20bb9-3  
EXPNO 2  
PROCNO 1

F2 - Acquisition Parameters

Date\_ 20020816  
Time 22.37  
INSTRUM dpx300  
PROBHD 5 mm Multinu  
PULPROG zgpg30  
TD 65536  
SOLVENT CDCl3  
NS 2114  
DS 2  
SWH 17605.635 Hz  
FIDRES 0.268641 Hz  
AQ 1.8612725 sec  
RG 4597.6  
DM 28.400 usec  
DE 5.00 usec  
TE 300.0 K  
D12 0.00002000 sec  
PL13 17.00 dB  
D1 1.00000000 sec  
waltz16  
CPDPRG2  
PCPD2 105.00 usec  
SF02 300.1312005 MHz  
NUC2 1H  
PL2 -4.00 dB  
PL12 17.00 dB  
P1 8.00 usec  
DE 5.00 usec  
SF01 75.4756682 MHz  
NUC1 13C  
PL1 -2.00 dB  
D11 0.03000000 sec

F2 - Processing parameters

SI 32768  
SF 75.4677510 MHz  
WDW EM  
SSB 0  
LB 1.00 Hz  
GB 0  
PC 1.40

1D NMR plot parameters

CX 20.00 cm  
F1P 217.064 ppm  
F1 16381.32 Hz  
F2P 12.773 ppm  
F2 963.96 Hz  
PNUC1 10.21454 ppm/cm  
HZCM 770.86810 Hz/cm

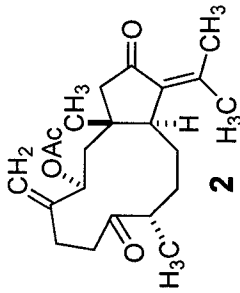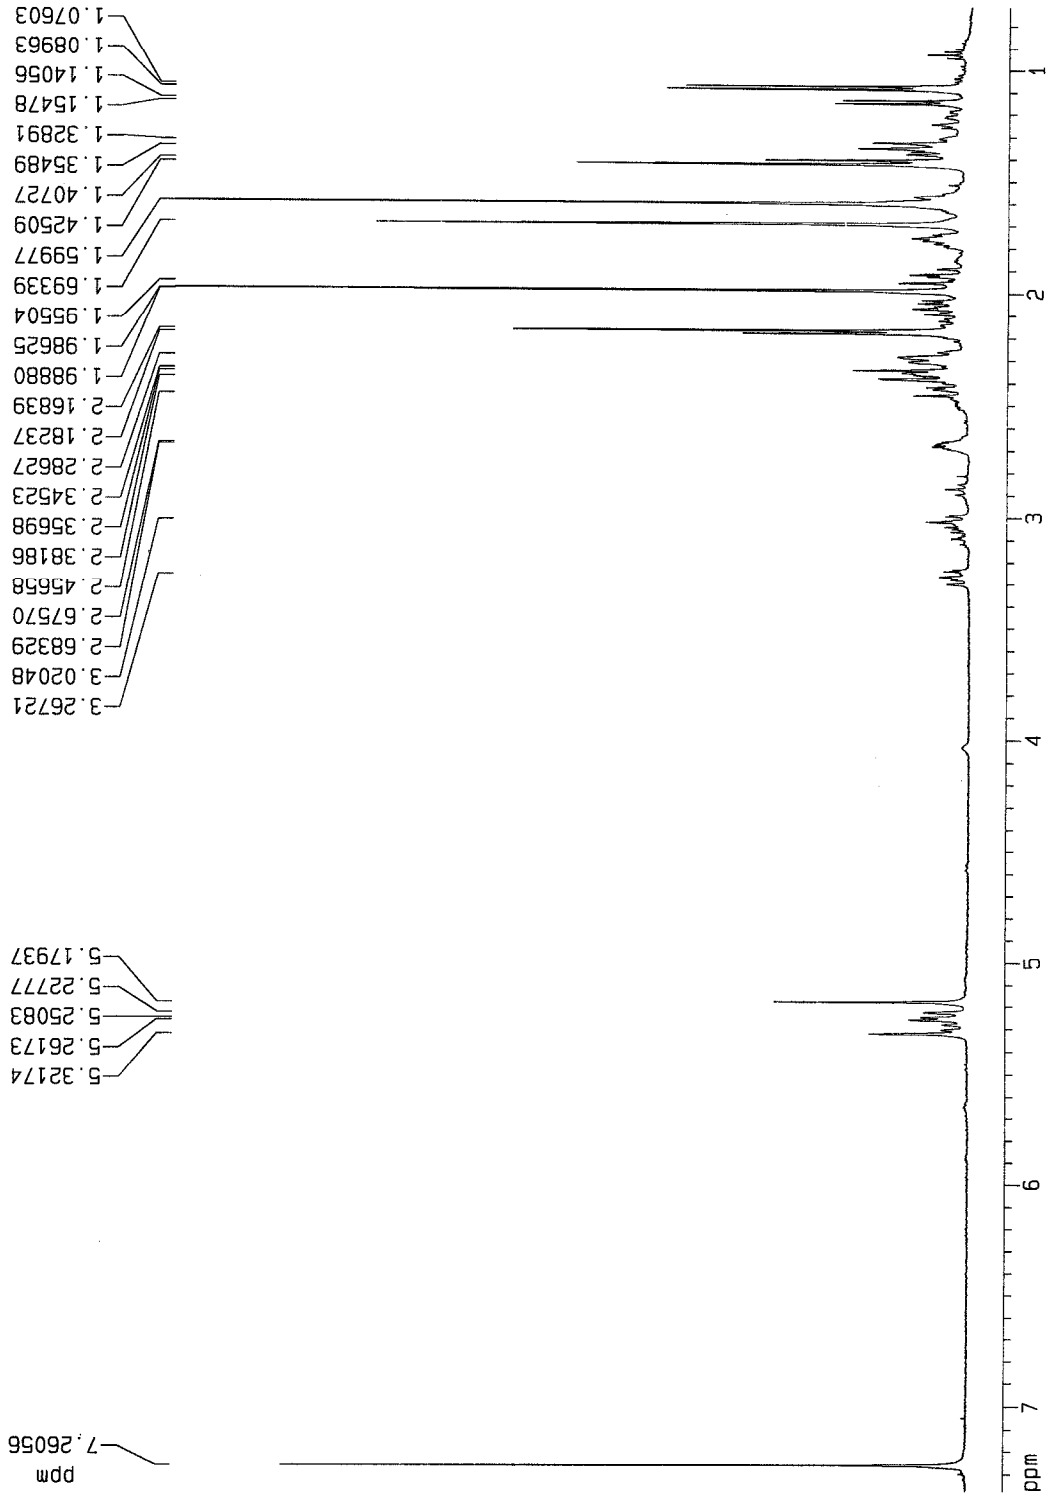

Current Data Parameters  
 NAME e36b34a10  
 EXPNO 1  
 PROCNO 1

F2 - Acquisition Parameters

Date\_ 20030104  
 Time 10.26  
 INSTRUM spect  
 PROBHD 5 mm Multinu  
 PULPROG zg30  
 TD 32768  
 SOLVENT CDCl3  
 NS 16  
 DS 2  
 SWH 7246.377 Hz  
 FIDRES 0.221142 Hz  
 AQ 2.2610421 sec  
 RG 456.1  
 DW 69.000 usec  
 DE 6.00 usec  
 TE 300.0 K  
 D1 1.0000000 sec  
 P1 10.50 usec  
 SFO1 500.1328885 MHz  
 NUC1 1H  
 PL1 0.00 dB

F2 - Processing parameters

SI 16384  
 SF 500.1300128 MHz  
 WDW EM  
 SSB 0  
 LB 0.30 Hz  
 GB 0  
 PC 1.00

1D NMR plot parameters

CX 20.00 cm  
 F1P 7.376 ppm  
 F1 3688.80 Hz  
 F2P 0.716 ppm  
 F2 358.04 Hz  
 PPMCM 0.33299 ppm/cm  
 HZCM 166.53828 Hz/cm

Current Data Parameters  
 EXPNO 3  
 PROCNO 1

F2 - Acquisition Parameters

Date\_ 20030104  
 Time 13.19  
 INSTRUM spect  
 PROBHD 5 mm Multinu  
 PULPROG invltp  
 TO 1024  
 SOLVENT CDCl3  
 NS 8  
 DS 32  
 SWH 7246.377 Hz  
 FIDRES 7.076540 Hz  
 AQ 0.0707660 sec  
 RG 4597.6  
 DM 69.000 usec  
 DE 6.00 usec  
 TE 300.0 K  
 D1 1.25000000 sec  
 D11 10.50 usec  
 D12 500.1328885 MHz  
 SF01 0.00 dB  
 NUC1 1H  
 PL1 0.00 dB  
 D2 0.00345000 sec  
 PL2 2.00 dB  
 P2 21.00 usec  
 P4 17.00 usec  
 SF02 125.7705955 MHz  
 NUC2 13C  
 D7 0.40000001 sec  
 P3 8.50 usec  
 D0 0.00003000 sec  
 PL12 20.00 dB  
 CPDPRG2 gprg  
 PCPD2 65.00 usec  
 TMO 0.00000825 sec

F1 - Acquisition Parameters

NUC 4  
 TD 256  
 SF01 125.771 MHz  
 FIDRES 118.372416 Hz  
 SW 240.588 ppm

F2 - Processing Parameters

SI 500.1300155 MHz  
 LOCK 1024  
 WCM 0.511 Hz  
 SSB 2  
 LB 0.00 Hz  
 GB 0  
 PC 1.40

F1 - Processing Parameters

SI 512  
 TP1 125.7577906 MHz  
 SINE 2  
 LB 0.00 Hz  
 GB 0

2D NMR plot parameters  
 CX2 15.00 cm  
 CX1 15.00 cm  
 F2PLO 5.461 ppm  
 F2LO 2726.43 Hz  
 F2PHI 0.796 ppm  
 F2H1 388.25 Hz  
 F1PLO 121.004 ppm  
 F1LO 15217.25 Hz  
 F1PHI 11.347 ppm  
 F1H1 1427.01 Hz  
 F2PHI0M 0.31034 ppm/cm  
 F2PHI 155.21211 Hz/cm  
 F1PHI0M  
 F1PHI

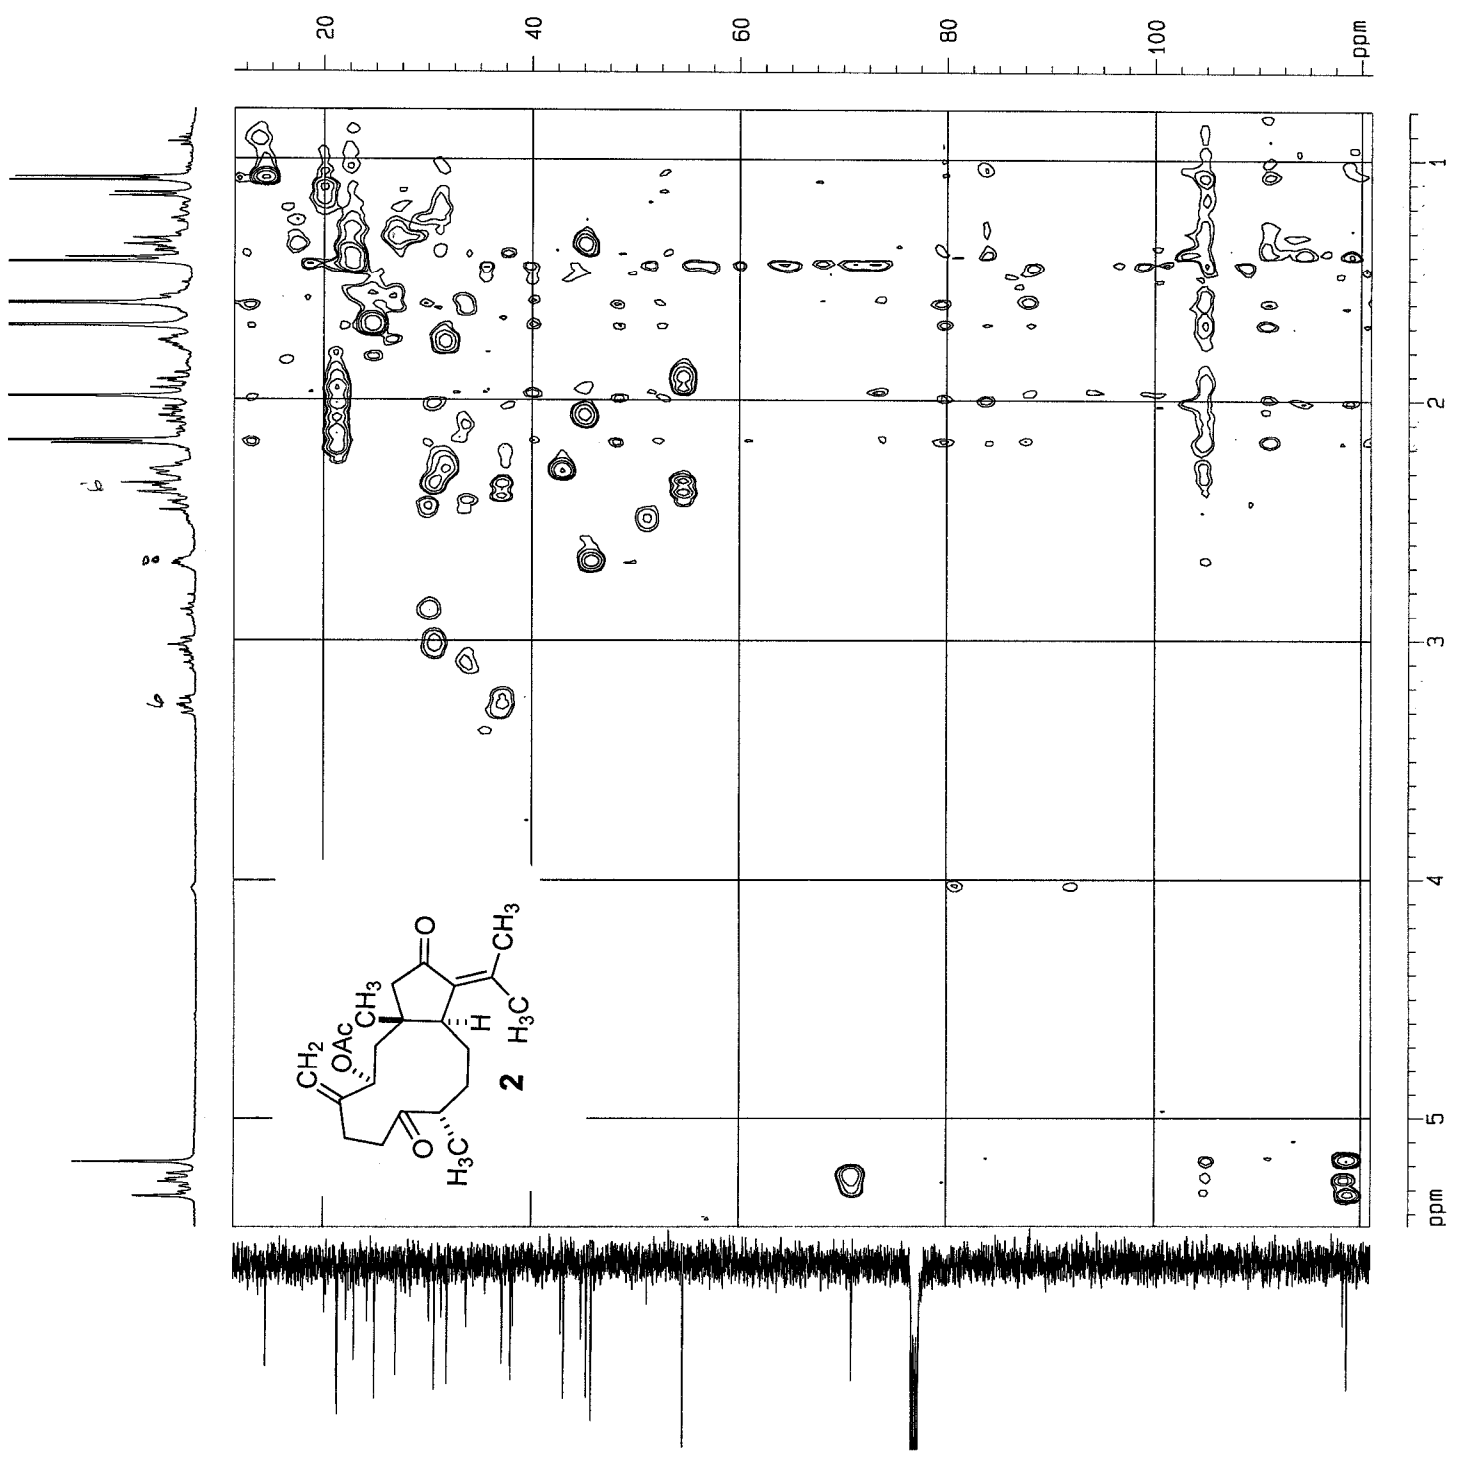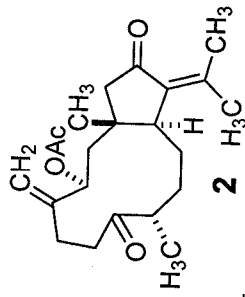

Current Data Parameters  
NAME e24h37  
EXPNO 1  
PROCNO 1

F2 - Acquisition Parameters

Date\_ 20021108  
Time 10.12  
INSTRUM dox300  
PROBHD 5 mm Multinu  
PULPROG zg30  
TD 32768  
SOLVENT CDC13  
NS 16  
DS 2  
SWH 4058.442 Hz  
FIDRES 0.123854 Hz  
AQ 4.0370674 sec  
RG 256  
DW 123.200 usec  
DE 5.00 usec  
TE 300.0 K  
D1 1.0000000 sec  
P1 11.00 usec  
DE 5.00 usec  
SF01 300.1315818 MHz  
NUC1 1H  
PL1 -4.00 dB

F2 - Processing parameters  
SI 16384  
SF 300.1300052 MHz  
WDW EM  
SSB 0  
LB 0.30 Hz  
GB 0  
PC 1.00

1D NMR plot parameters  
CX 20.00 cm  
F1P 5.492 ppm  
F1 1648.32 Hz  
F2P 0.747 ppm  
F2 224.23 Hz  
PPMCM 0.23725 ppm/cm  
HZCM 71.20472 Hz/cm

5.41688  
5.40957  
5.38160  
5.37449  
5.24859  
5.21954  
5.18377  
5.14140  
5.10316  
5.05041  
5.03354  
4.93873  
4.79360  
4.69263  
3.56962  
3.53249  
3.49856  
3.30100  
3.26982  
3.23028  
2.74925  
2.66753  
2.52888  
2.47248  
2.39527  
2.33467  
2.20786  
2.17794  
2.16714  
2.13339  
2.06963  
2.06317  
2.02782  
2.00197  
1.96777  
1.75790  
1.68086  
1.66311  
1.62346  
1.59589  
1.35806  
1.31687  
1.30482  
1.27677  
1.26943  
1.22993  
1.03553  
1.02964

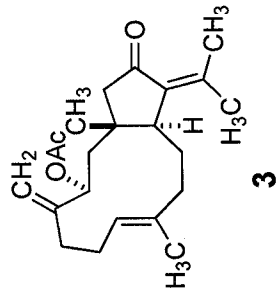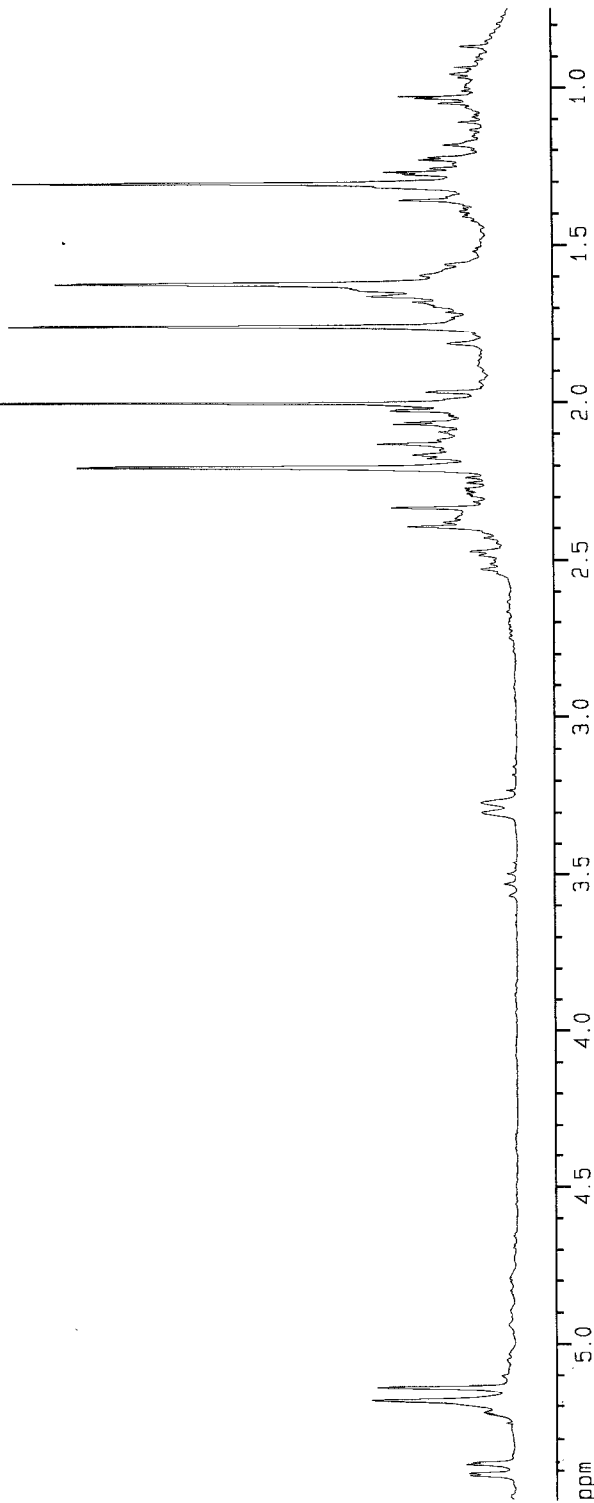

rpar: C13CPD

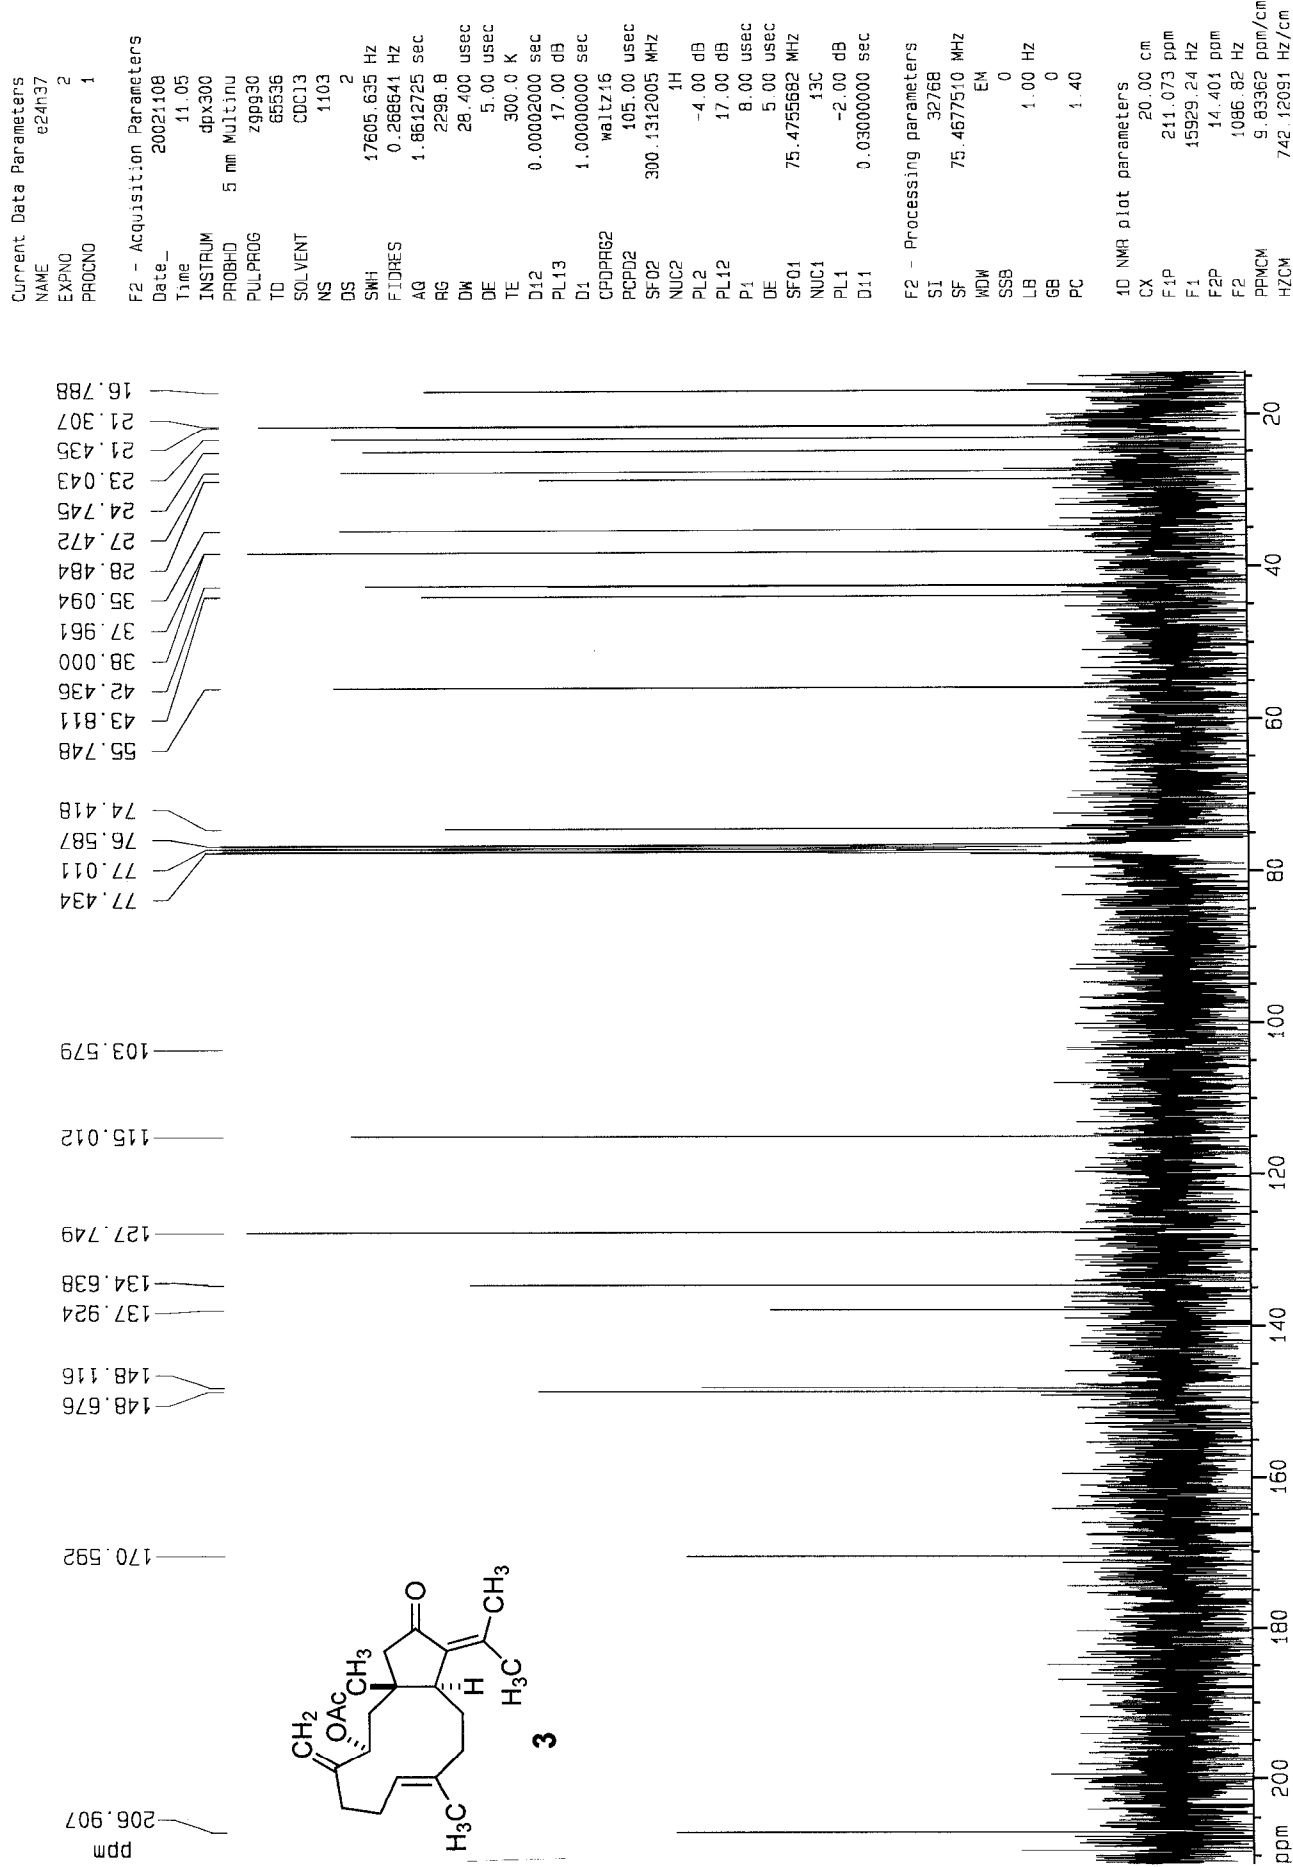

rpar: C13CPD

Current Data Parameters  
NAME e41b3425  
EXPNO 2  
PROCNO 1

F2 - Acquisition Parameters

Date\_ 20030308  
Time 13.56  
INSTRUM dpx300  
PROBHD 5 mm Multinu  
PULPROG zgpg30  
TD 65536  
SOLVENT CDC13  
NS 5013  
DS 2  
SWH 17605.635 Hz  
FIDRES 0.268641 Hz  
AQ 1.8612725 sec  
RG 2298.8  
DM 28.400 usec  
DE 5.00 usec  
TE 300.0 K  
D12 0.00002000 sec  
PL13 17.00 dB  
D1 1.00000000 sec  
PCPDPRG2 waltz16  
PCPD2 105.00 usec  
SF02 300.1312005 MHz  
NUC2 1H  
PL2 -4.00 dB  
PL12 17.00 dB  
P1 8.00 usec  
DE 5.00 usec  
SF01 75.4755682 MHz  
NUC1 13C  
PL1 -2.00 dB  
D11 0.03000000 sec

F2 - Processing parameters  
SI 32768  
SF 75.4677510 MHz  
WDW EM  
SSB 0  
LB 1.00 Hz  
GB 0  
PC 1.40

1D NMR plot parameters  
CX 20.00 cm  
F1P 209.239 ppm  
F1 15790.79 Hz  
F2P 13.143 ppm  
F2 99.86 Hz  
PPMCM 9.80481 ppm/cm  
HZCM 739.94690 Hz/cm

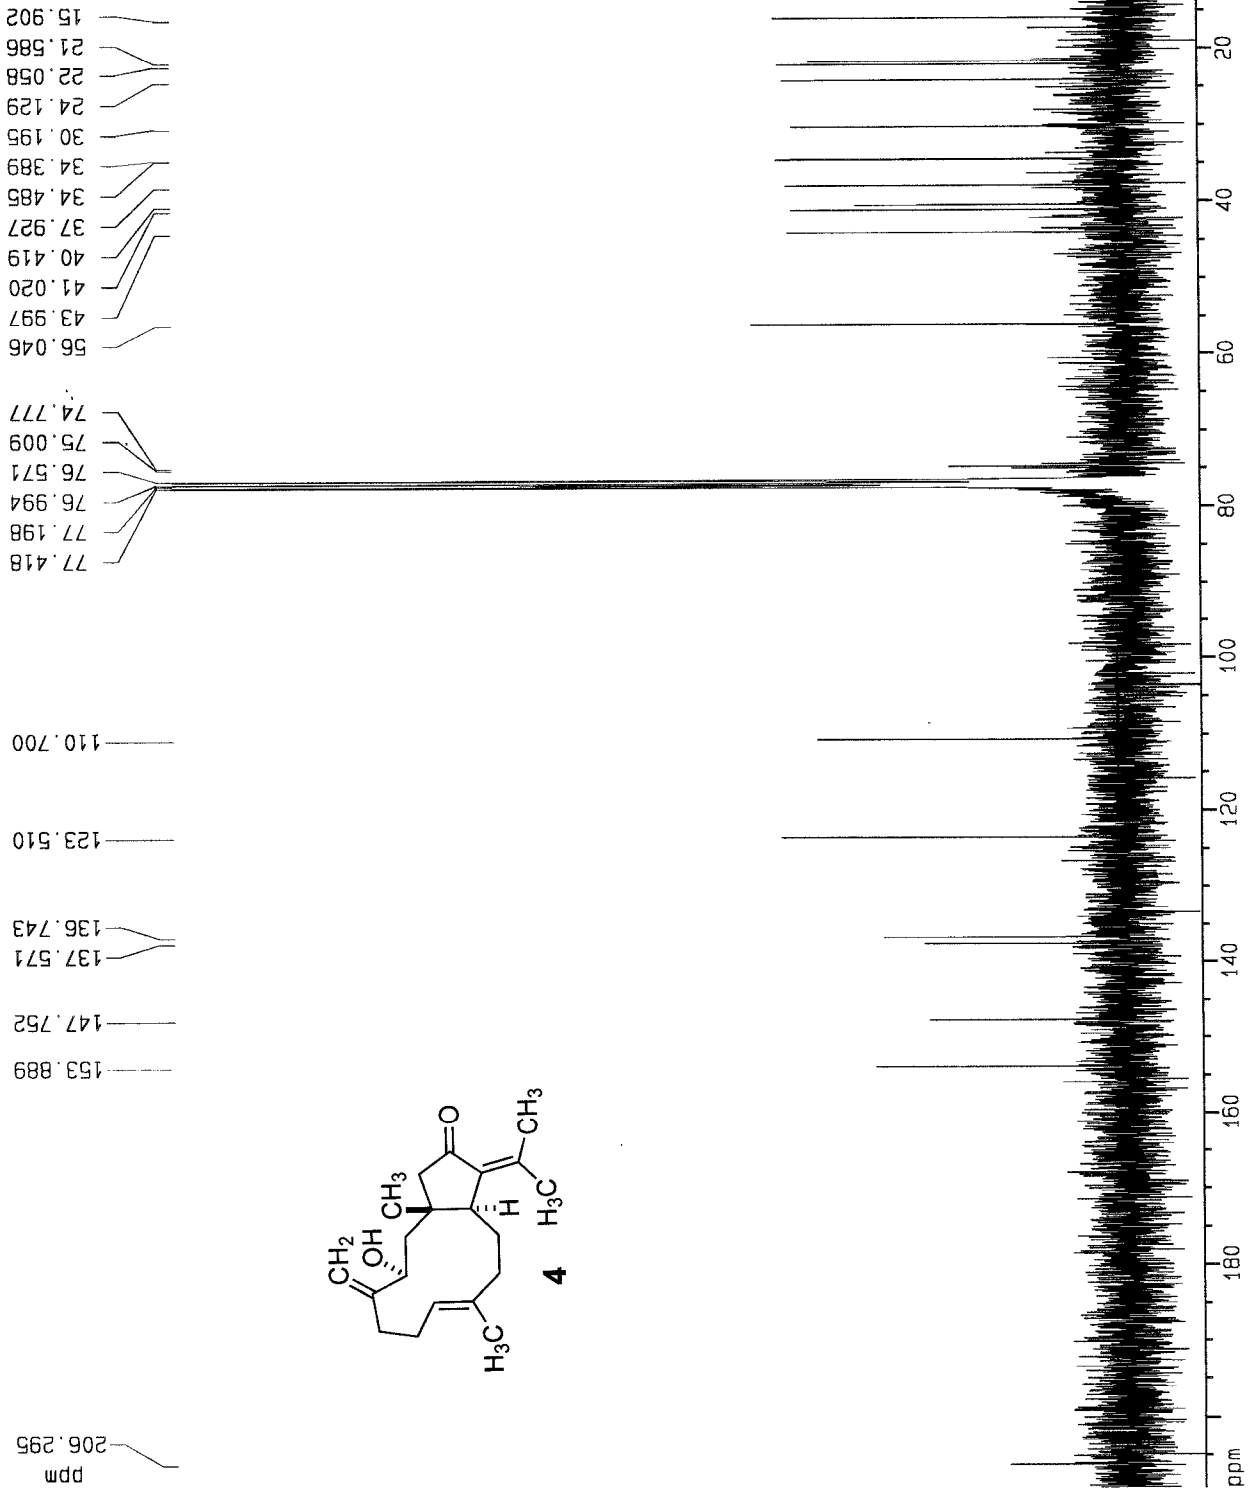



Current Data Parameters  
NAME  
EXPNO  
PROCNO

5  
1

F2 - Acquisition Parameters

Date 20030310  
Time 19.20  
INSTRUM oxa300  
PROBHD 5 mm Multinu  
PULPROG zgpg30  
TD 1024  
SOLVENT CDCl3  
NS 8  
DS 16  
SWH 4058.442 Hz  
FIDRES 3.963322 Hz  
AQ 0.1822066 sec  
RG 8192  
DM 122.200 usec  
DE 4.50 usec  
TE 300.0 K  
D1 1.5000000 sec  
D2 11.00 usec  
D3 0.0034500 sec  
PL2 -3.00 dB  
PA 22.00 usec  
SFO2 75.475562 MHz  
NUC2 13C  
D7 0.4000001 sec  
P3 9.00 usec  
D0 0.0000300 sec  
PL12 19.00 dB  
DE 4.50 usec  
SFO1 300.1315818 MHz  
NUC1 1H  
PL1 -4.00 dB  
CHOPPC2 gbrp  
PCPD2 100.00 usec  
INQ 0.00001420 sec

F1 - Acquisition Parameters

NU0 4  
TD 256  
SFO1 75.47557 MHz  
FIDRES 66.772102 Hz  
SM 233.263 ppm

F2 - Processing parameters

SI 1024  
SF 300.1300062 MHz  
WDW 0SINE  
SSB 2  
LB 0.00 Hz  
GB 0  
PC 1.40

F1 - Processing parameters

SI 512  
MC2 TPP1  
SF 75.467526 MHz  
WDW SINE  
SSB 2  
LB 0.00 Hz  
GB 0

2D NMR plot parameters

CX2 15.00 cm  
CX1 15.00 cm  
F2P10 5.461 ppm  
F2C 1638.97 Hz  
F2P41 0.945 ppm  
F2H1 283.52 Hz  
F1P10 129.433 ppm  
F1C 9466.13 Hz  
F1P41 7434 ppm  
F1H1 330.38 Hz  
GPRKN 0.106 ppm/cp  
ZBZCA 50.2623 Hz/cm  
F1PKN 63.323 ppm/cm  
ZBZCA 50.2623 Hz/cm  
F1ZCA

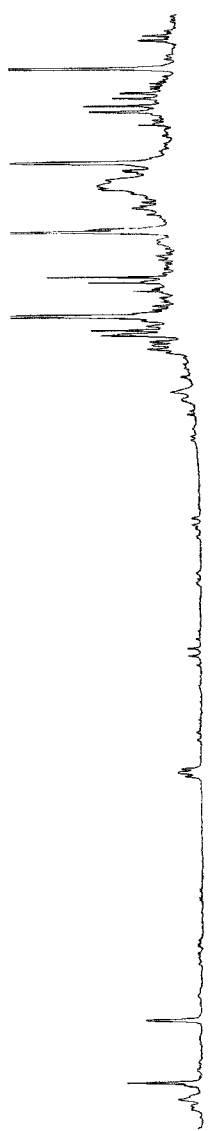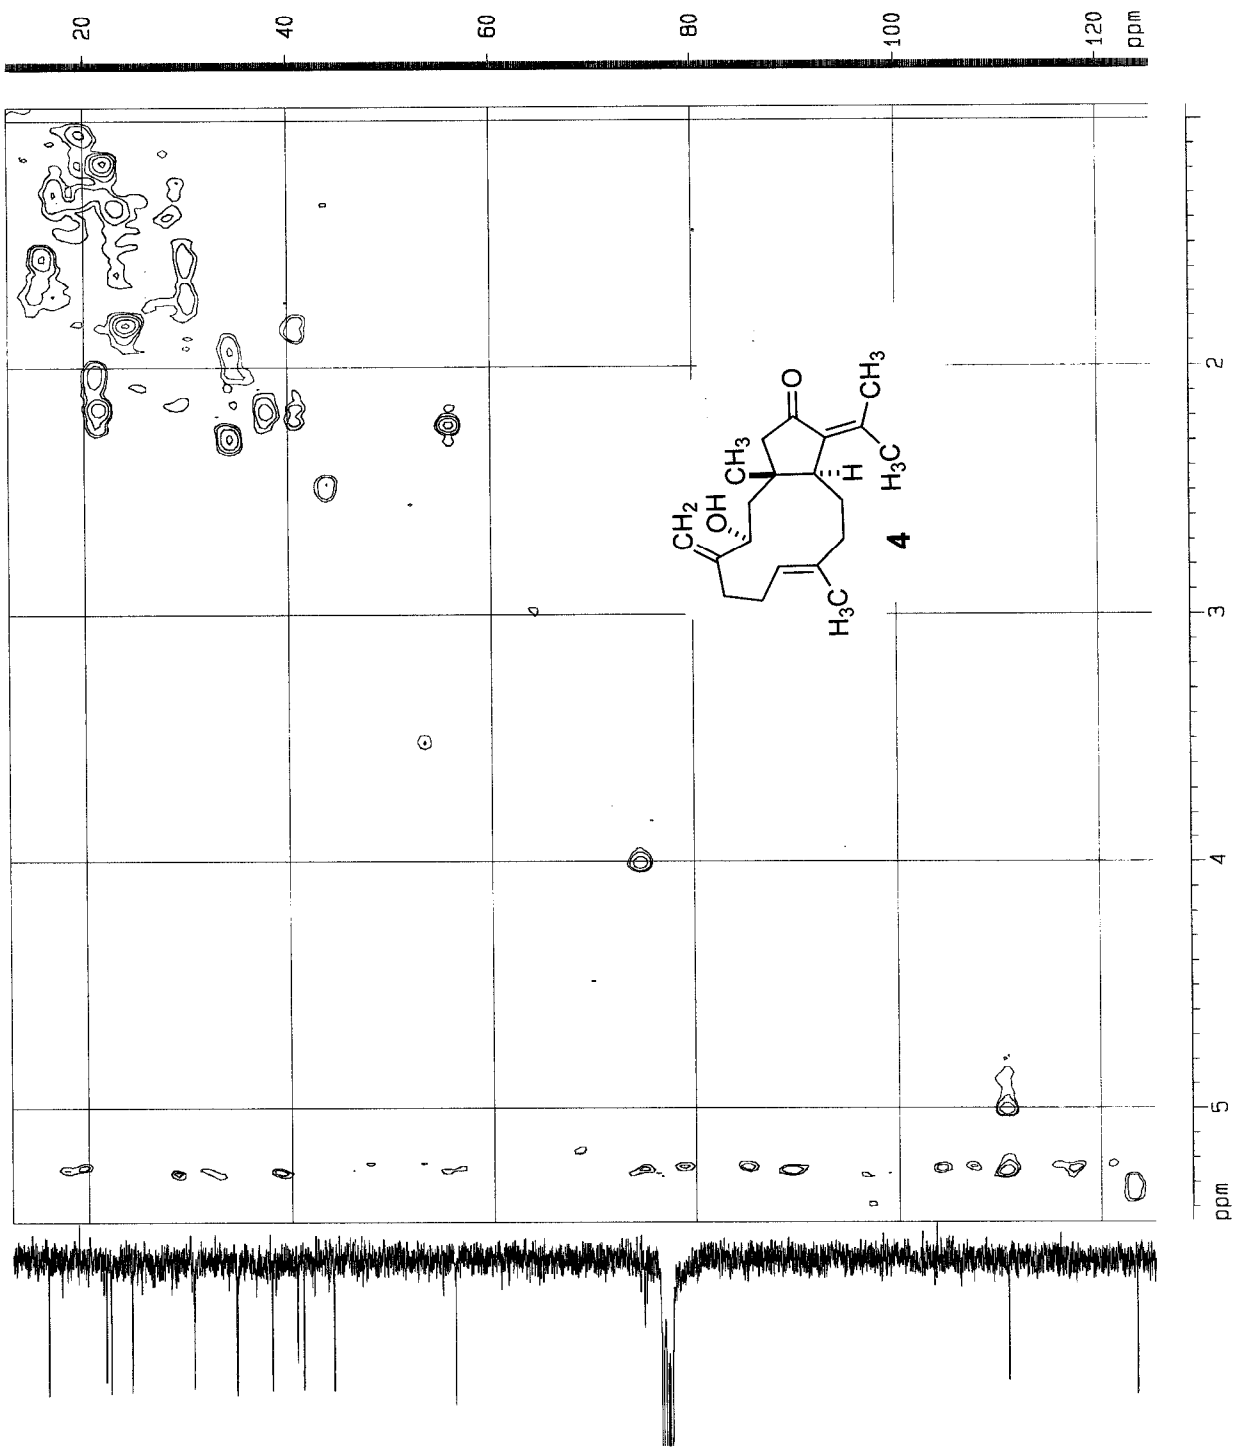

ppm

ppm

Current Data Parameters  
 NAME e41b3331  
 EXPNO 1  
 PROCNO 1

F2 - Acquisition Parameters  
 Date\_ 20030224  
 Time 20.05  
 INSTRUM dpx300  
 PROBHD 5 mm Multinu  
 PULPROG zg30  
 TD 32768  
 SOLVENT CDCl3  
 NS 16  
 DS 2  
 SWH 4058.442 Hz  
 FIDRES 0.123854 Hz  
 AQ 4.0370674 sec  
 RG 574.7  
 DM 123.200 usec  
 DE 5.00 usec  
 TE 300.0 K  
 D1 1.00000000 sec  
 P1 11.00 usec  
 DE 5.00 usec  
 SF01 300.131518 MHz  
 NUC1 1H  
 PL1 -4.00 dB

F2 - Processing parameters  
 SI 16384  
 SF 300.1300062 MHz  
 WDW EM  
 SSB 0  
 LB 0.30 Hz  
 GB 0  
 PC 1.00

1D NMR plot parameters  
 CX 20.00 cm  
 F1P 5.586 ppm  
 F1 1680.17 Hz  
 F2P 0.751 ppm  
 F2 225.28 Hz  
 PPMCM 0.24236 ppm/cm  
 HZCM 72.74456 Hz/cm

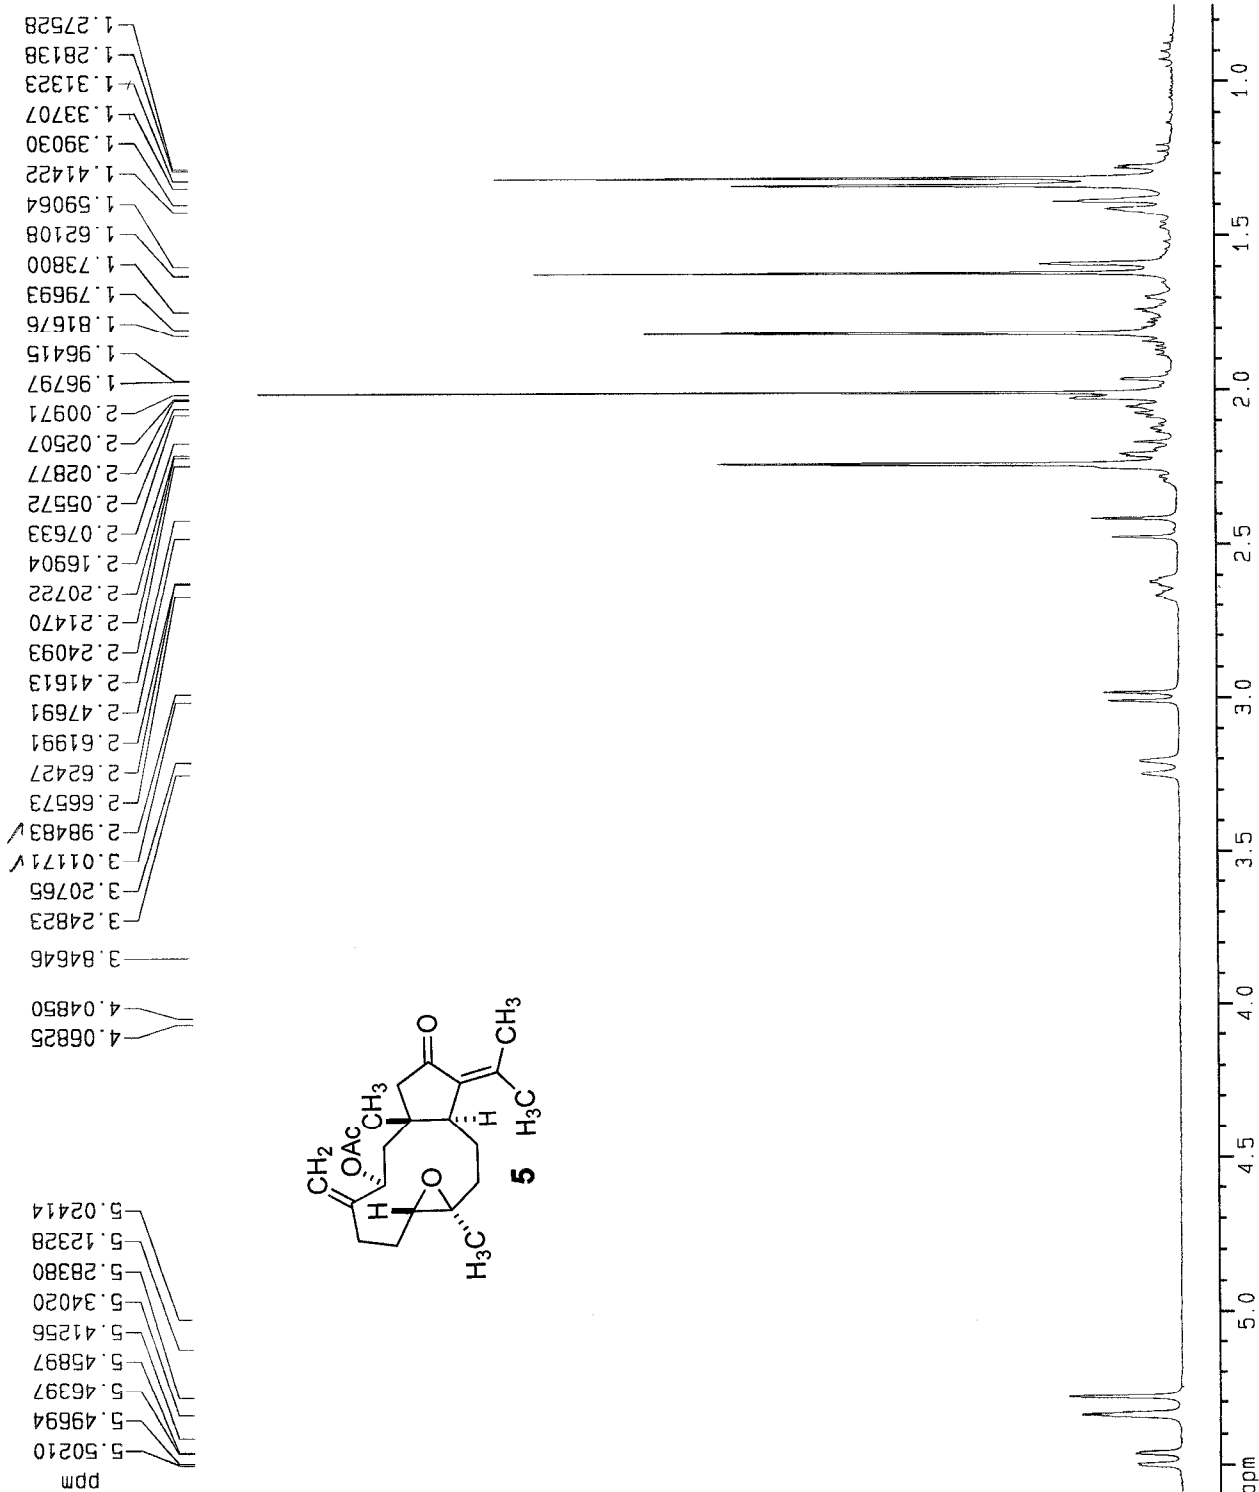

ppar: C13CPD

Current Data Parameters  
 NAME e41b3332  
 EXPNO 2  
 PROCNO 1

F2 - Acquisition Parameters  
 Date\_ 20030224  
 Time 20.36  
 INSTRUM dpx300  
 PROBHD 5 mm Multinu  
 PULPROG zgpg30  
 TD 65536  
 SOLVENT CDCl3  
 NS 645  
 DS 2  
 SWH 17605.635 Hz  
 FIDRES 0.268641 Hz  
 AQ 1.8612725 sec  
 RG 2048  
 DM 28.400 usec  
 DE 5.00 usec  
 TE 300.0 K  
 D12 0.00002000 sec  
 PL13 17.00 dB  
 D1 1.00000000 sec  
 waltz16  
 CPDPRG2  
 PCPD2 105.00 usec  
 SF02 300.1312005 MHz  
 NUC2 1H  
 PL2 -4.00 dB  
 PL12 17.00 dB  
 P1 8.00 usec  
 DE 5.00 usec  
 SF01 75.4755682 MHz  
 NUC1 13C  
 PL1 -2.00 dB  
 D11 0.03000000 sec

F2 - Processing parameters  
 SI 32768  
 SF 75.4677510 MHz  
 WDW EM  
 SSB 0  
 LB 1.00 Hz  
 GB 0  
 PC 1.40

1D NMR plot parameters  
 CX 20.00 cm  
 F1P 207.418 ppm  
 F1 15653.38 Hz  
 F2P 15.284 ppm  
 F2 1153.41 Hz  
 PPMCM 9.60673 ppm/cm  
 HZCM 724.99829 Hz/cm

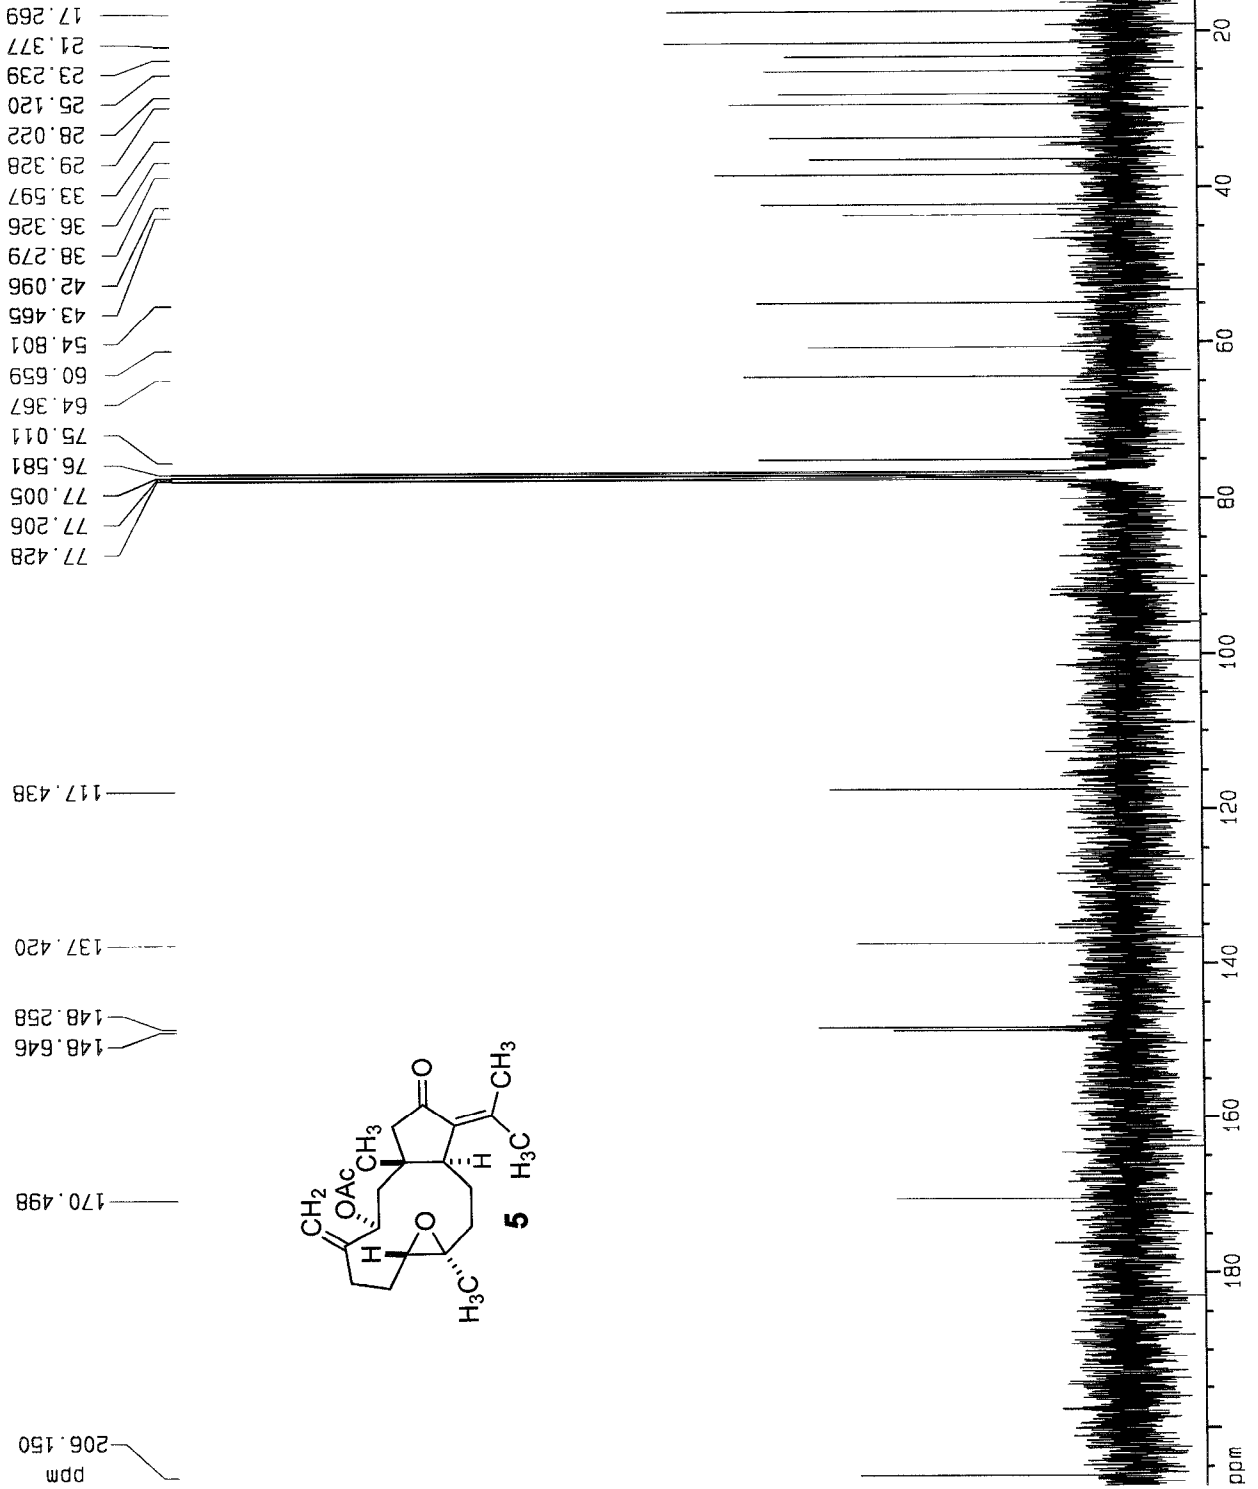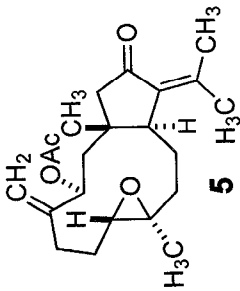

Current Data Parameters  
 NAME e27p2hplc10  
 EXPNO 1  
 PROCNO 1

F2 - Acquisition Parameters  
 Date\_ 20021016  
 Time 16.29  
 INSTRUM gdx300  
 PROBHD 5 mm Multinu  
 PULPROG zg30  
 TD 32768  
 SOLVENT CDCl3  
 NS 16  
 DS 2  
 SWH 4058.442 Hz  
 FIDRES 0.123854 Hz  
 AQ 4.0370674 sec  
 RG 362  
 DW 123.200 usec  
 DE 5.00 usec  
 TE 300.0 K  
 D1 1.00000000 sec  
 P1 11.00 usec  
 DE 5.00 usec  
 SF01 300.1315818 MHz  
 NUC1 1H  
 PL1 -4.00 dB

F2 - Processing parameters  
 SI 16384  
 SF 300.1300062 MHz  
 WDW EM  
 SSB 0  
 LB 0.30 Hz  
 GB 0  
 PC 1.00

1D NMR plot parameters  
 CX 20.00 cm  
 F1P 7.454 ppm  
 F1 2237.23 Hz  
 F2P 0.644 ppm  
 F2 193.30 Hz  
 PPMCM 0.34051 ppm/cm  
 HZCM 102.19626 Hz/cm

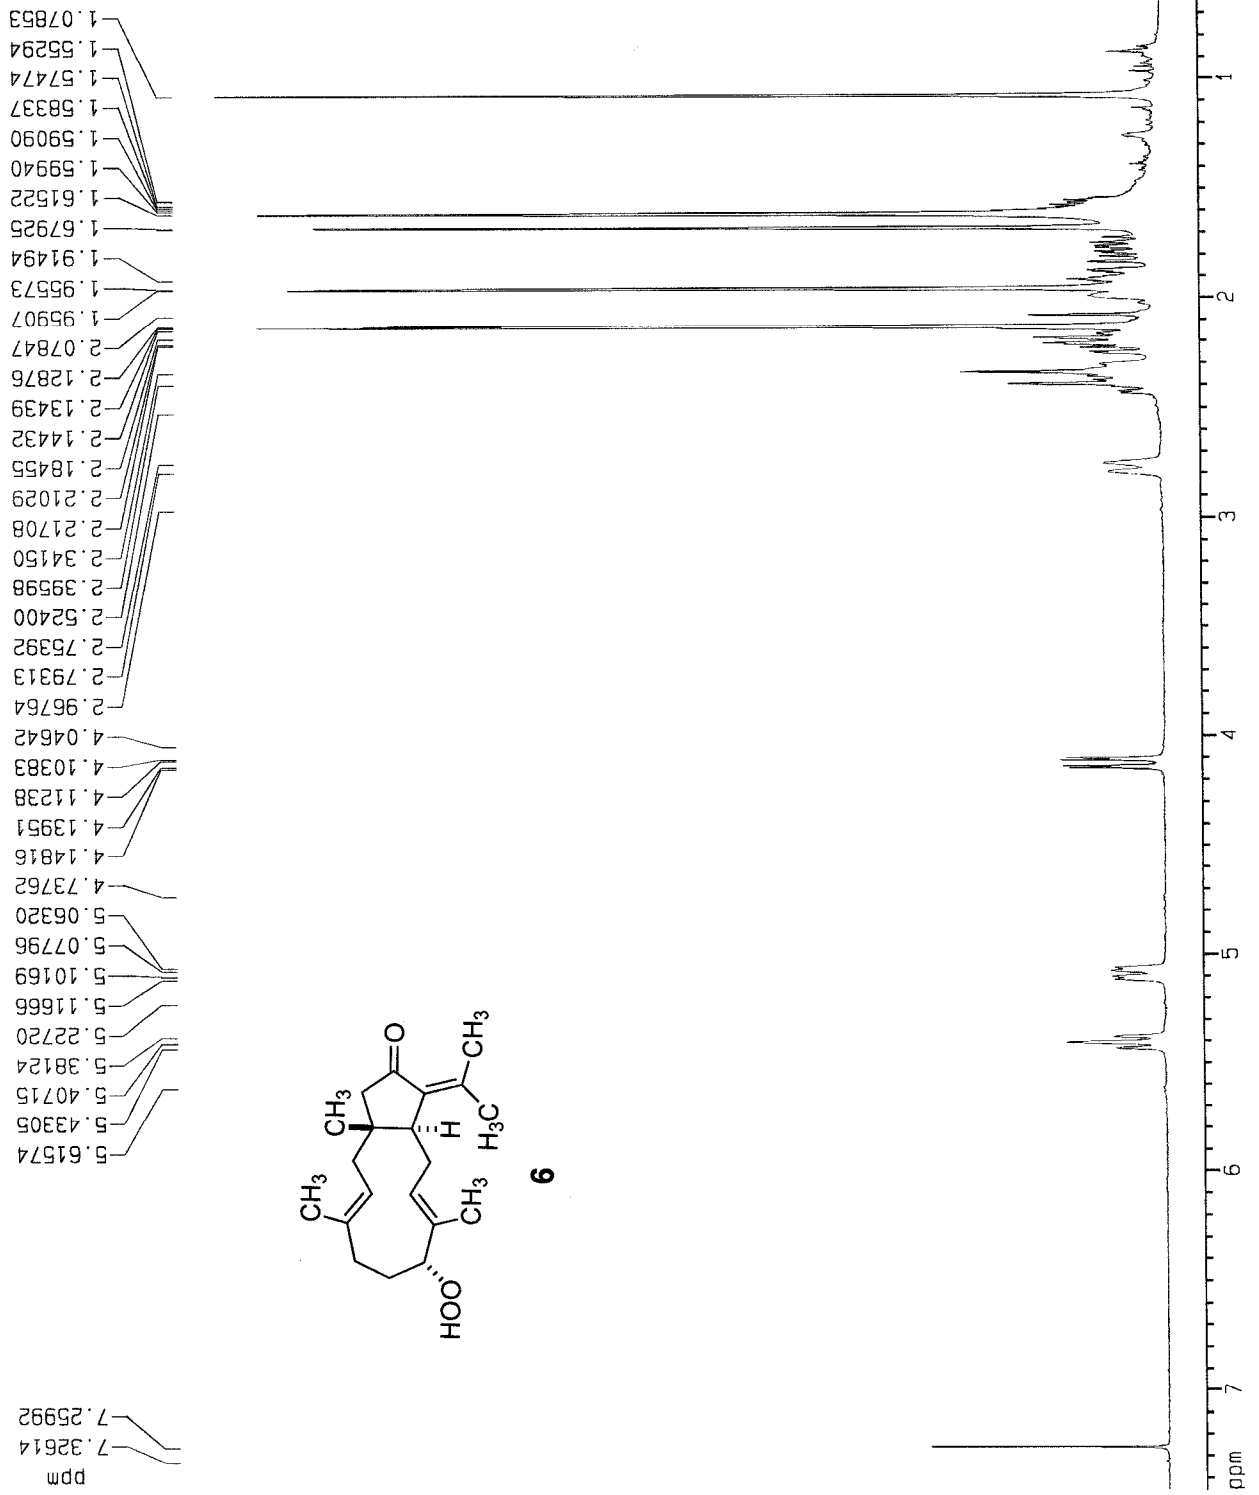

rpar: C13CPD

Current Data Parameters  
NAME e27o2hpic10  
EXPNO 2  
PROCNO 1

F2 - Acquisition Parameters

Date\_ 20021016  
Time 17.16  
INSTRUM dpx300  
PROBHD 5 mm Multinu  
PULPROG zgpg30  
TD 65536  
SOLVENT CDC13  
NS 949  
DS 2  
SWH 17605.635 Hz  
FIDRES 0.268641 Hz  
AQ 1.8612725 sec  
RG 2296.8  
DW 28.400 usec  
DE 5.00 usec  
TE 300.0 K  
D12 0.00002000 sec  
PL13 17.00 dB  
D1 1.00000000 sec  
CPDPRG2 waltz16  
PCPD2 105.00 usec  
SF02 300.1312005 MHz  
NUC2 <sup>1</sup>H  
PL2 -4.00 dB  
PL12 17.00 dB  
P1 8.00 usec  
DE 5.00 usec  
SF01 75.4755682 MHz  
NUC1 <sup>13</sup>C  
PL1 -2.00 dB  
D11 0.03000000 sec

F2 - Processing parameters

SI 32768  
SF 75.4677510 MHz  
WDW EM  
SSB 0  
LB 1.00 Hz  
GB 0  
PC 1 40  
1D NMR plot parameters  
CX 20.00 cm  
F1P 208.394 ppm  
F1 15727.00 Hz  
F2P 8.071 ppm  
F2 609.12 Hz  
PPMCM 10.04612 ppm/cm  
HZCM 755.89398 Hz/cm

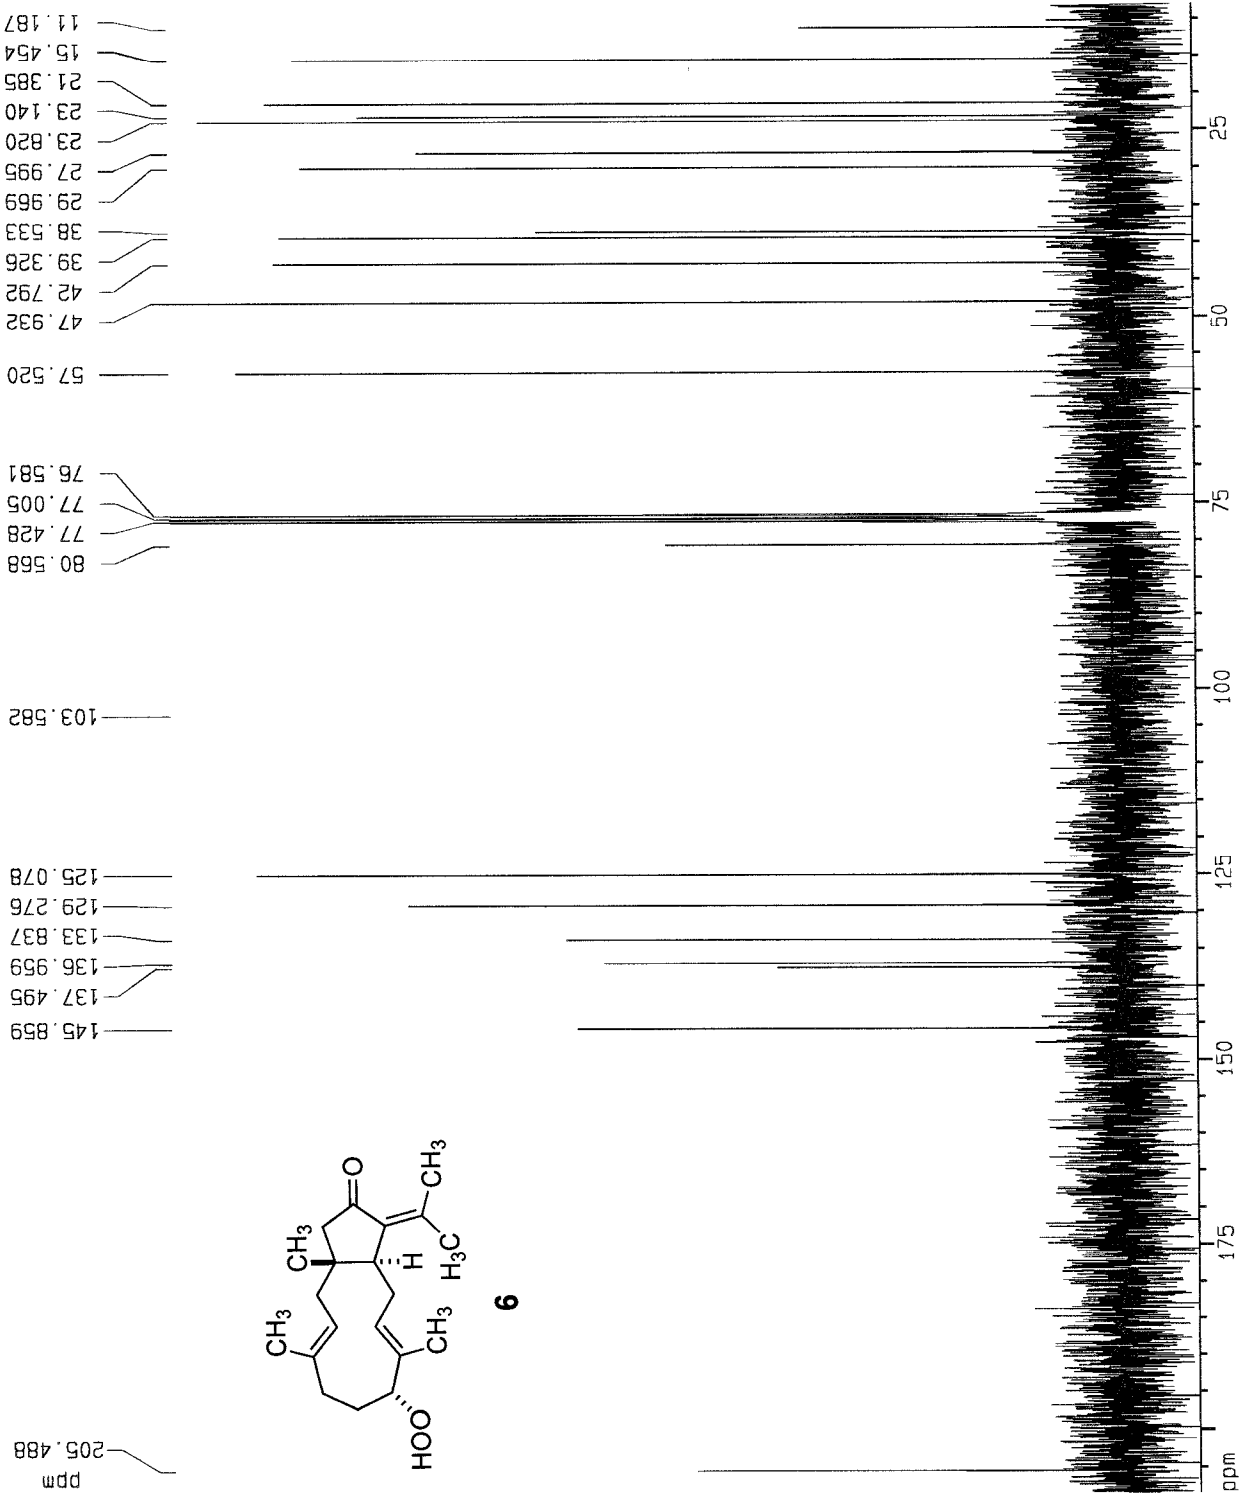

Current Data Parameters  
 NAME e41b335  
 EXPNO 1  
 PROCNO 1

F2 - Acquisition Parameters  
 Date\_ 20030220  
 Time 20.51  
 INSTRUM dpx300  
 PROBHD 5 mm Multinu  
 PULPROG zg30  
 TD 32768  
 SOLVENT CDCl3  
 NS 16  
 DS 2  
 SWH 4058.442 Hz  
 FIDRES 0.123854 Hz  
 AQ 4.0370674 sec  
 RG 1149.4  
 DW 123.200 usec  
 DE 5.00 usec  
 TE 300.0 K  
 D1 1.00000000 sec  
 P1 11.00 usec  
 DE 5.00 usec  
 SF01 300.1315818 MHz  
 NUC1 1H  
 PL1 -4.00 dB

F2 - Processing parameters  
 SI 16384  
 SF 300.1300052 MHz  
 WDW EM  
 SSB 0  
 LB 0.30 Hz  
 GB 0  
 PC 1.00

1D NMR plot parameters  
 CX 20.00 cm  
 F1P 5.578 ppm  
 F1 1674.22 Hz  
 F2P 0.867 ppm  
 F2 260.33 Hz  
 PPMCM 0.23555 ppm/cm  
 HZCM 70.69450 Hz/cm

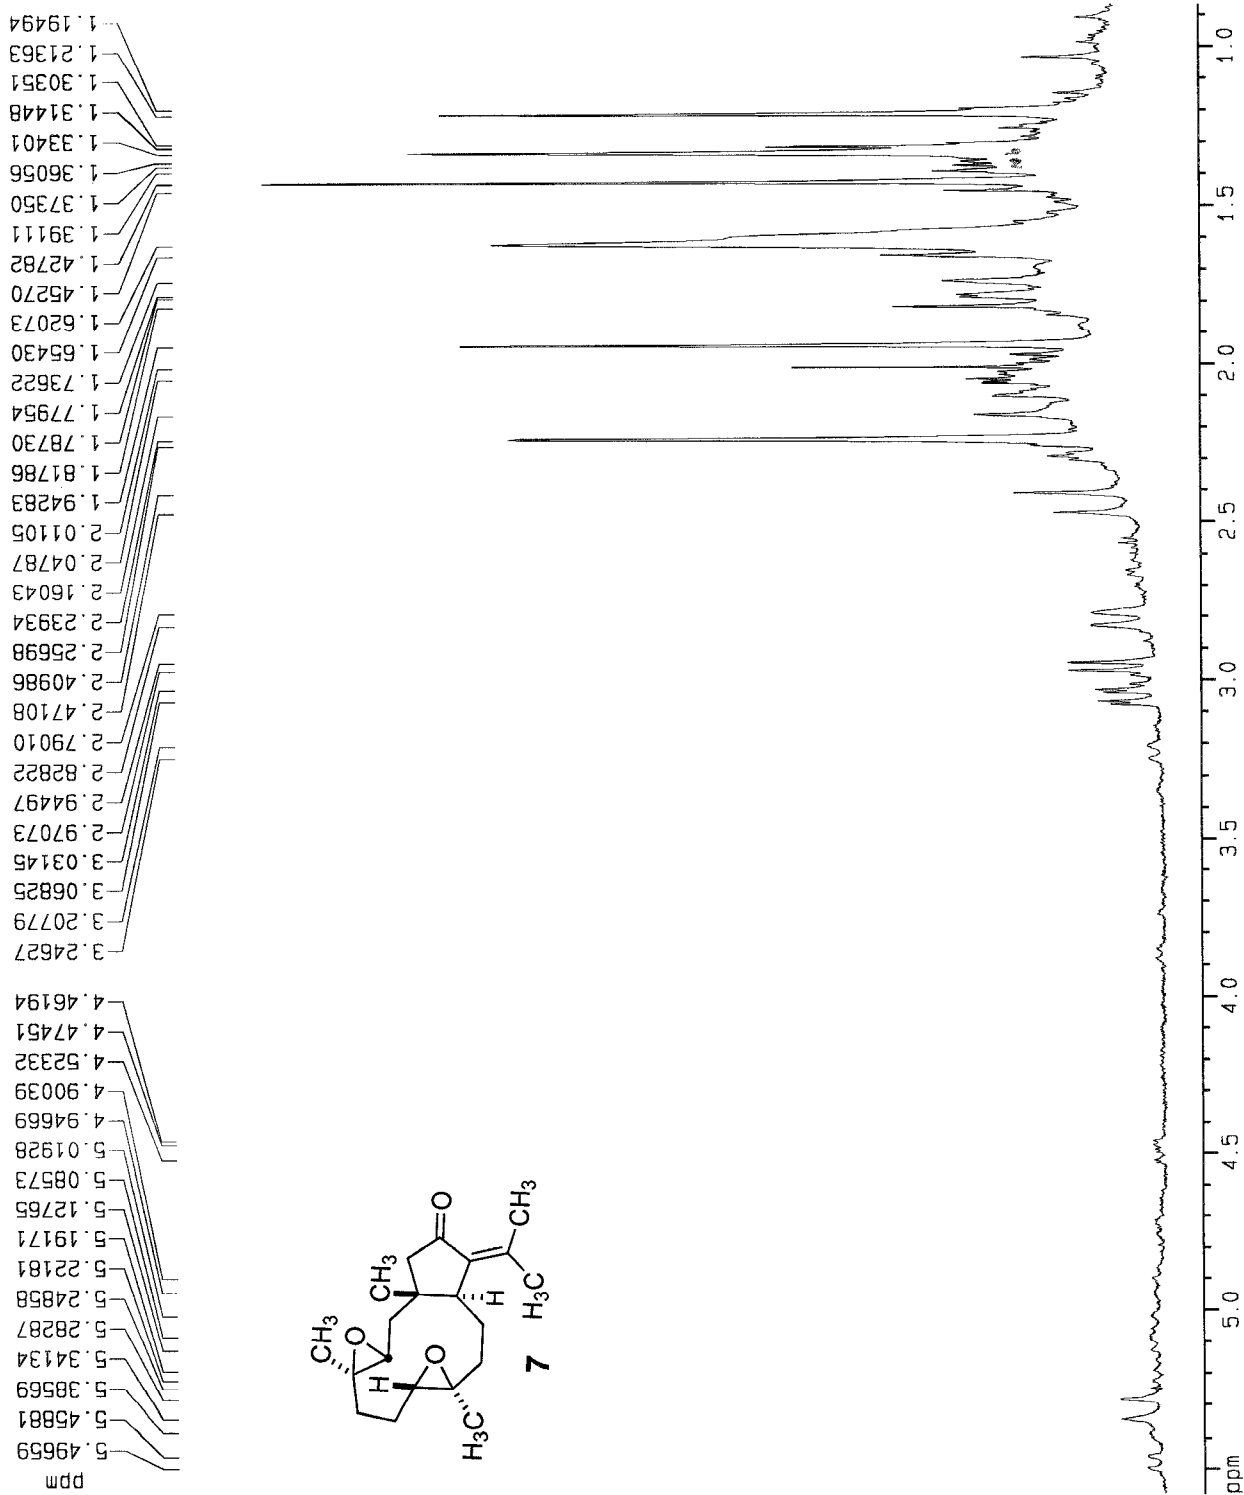

Current Data Parameters  
 NAME e41b335  
 EXPNO 2  
 PROCNO 1

F2 - Acquisition Parameters  
 Date\_ 20030222  
 Time 10.16  
 INSTRUM spect  
 PROBHD 5 mm Multinu  
 PULPROG zgpg30  
 TD 65536  
 SOLVENT CDCl3  
 NS 8748  
 DS 2

SWH 30303.031 Hz  
 FIDRES 0.462388 Hz  
 AQ 1.0813940 sec  
 RG 4096  
 DW 16.500 usec  
 DE 6.00 usec  
 TE 300.0 K

Df2 0.00002000 sec  
 PL13 22.00 dB  
 D1 1.00000000 sec  
 CPDPRG2 waitz16  
 PCPD2 94.00 usec  
 SF02 500.1320005 MHz  
 NUC2 1H

PL2 0.00 dB  
 PL12 21.00 dB  
 P1 9.35 usec  
 SF01 125.7709955 MHz  
 NUC1 13C  
 PL1 2.00 dB  
 D11 0.03000000 sec

F2 - Processing parameters  
 SI 32768  
 SF 125.7577906 MHz  
 WDW EM  
 SSB 0  
 LB 1.00 Hz  
 GB 0  
 PC 1.00

1D NMR plot parameters  
 CX 20.00 cm  
 F1P 207.135 ppm  
 F1 26048.89 Hz  
 F2P 14.242 ppm  
 F2 1791.00 Hz  
 PPMCM 9.64469 ppm/cm  
 HZCM 1212.89465 Hz/cm

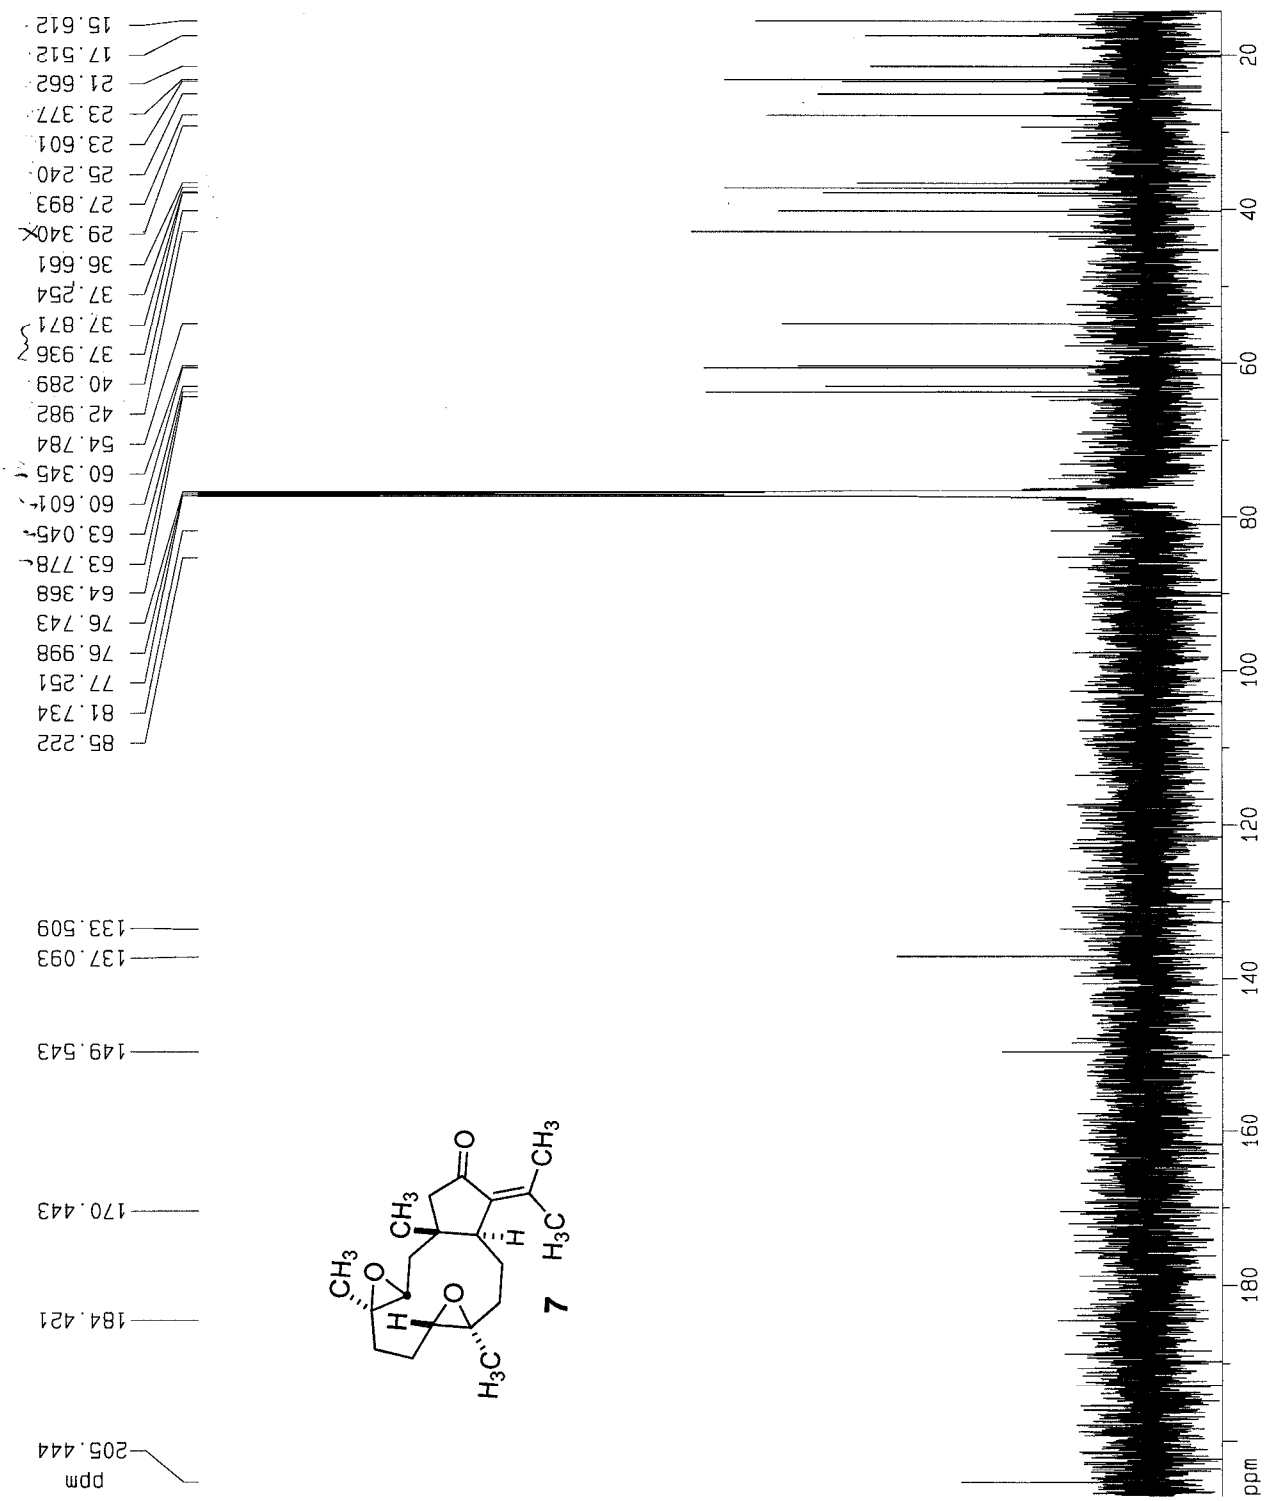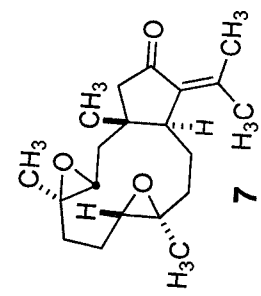

Current Data Parameters  
 NAME e29623rh5  
 EXPNO 1  
 PROCNO 1

F2 - Acquisition Parameters  
 Date\_ 20021120  
 Time 16.17  
 INSTRUM dpx300  
 PROBHD 5 mm Multinu  
 PULPROG zg30  
 TD 32768  
 SOLVENT CDCl3  
 NS 16  
 DS 2  
 SWH 4058.442 Hz  
 FIDRES 0.123854 Hz  
 AQ 4.0370674 sec  
 RG 181  
 DW 123.200 usec  
 DE 5.00 usec  
 TE 300.0 K  
 D1 1.0000000 sec  
 P1 11.00 usec  
 DE 5.00 usec  
 SF01 300.1315818 MHz  
 NUC1 1H  
 PL1 -4.00 dB

F2 - Processing parameters  
 SI 16384  
 SF 300.1300062 MHz  
 WDW EM  
 SSB 0  
 LB 0.30 Hz  
 GB 0  
 PC 1.00

1D NMR plot parameters  
 CX 20.00 cm  
 F1P 7.335 ppm  
 F1 2201.36 Hz  
 F2P 0.842 ppm  
 F2 252.74 Hz  
 PPMCM 0.32483 ppm/cm  
 HZCM 97.43104 Hz/cm

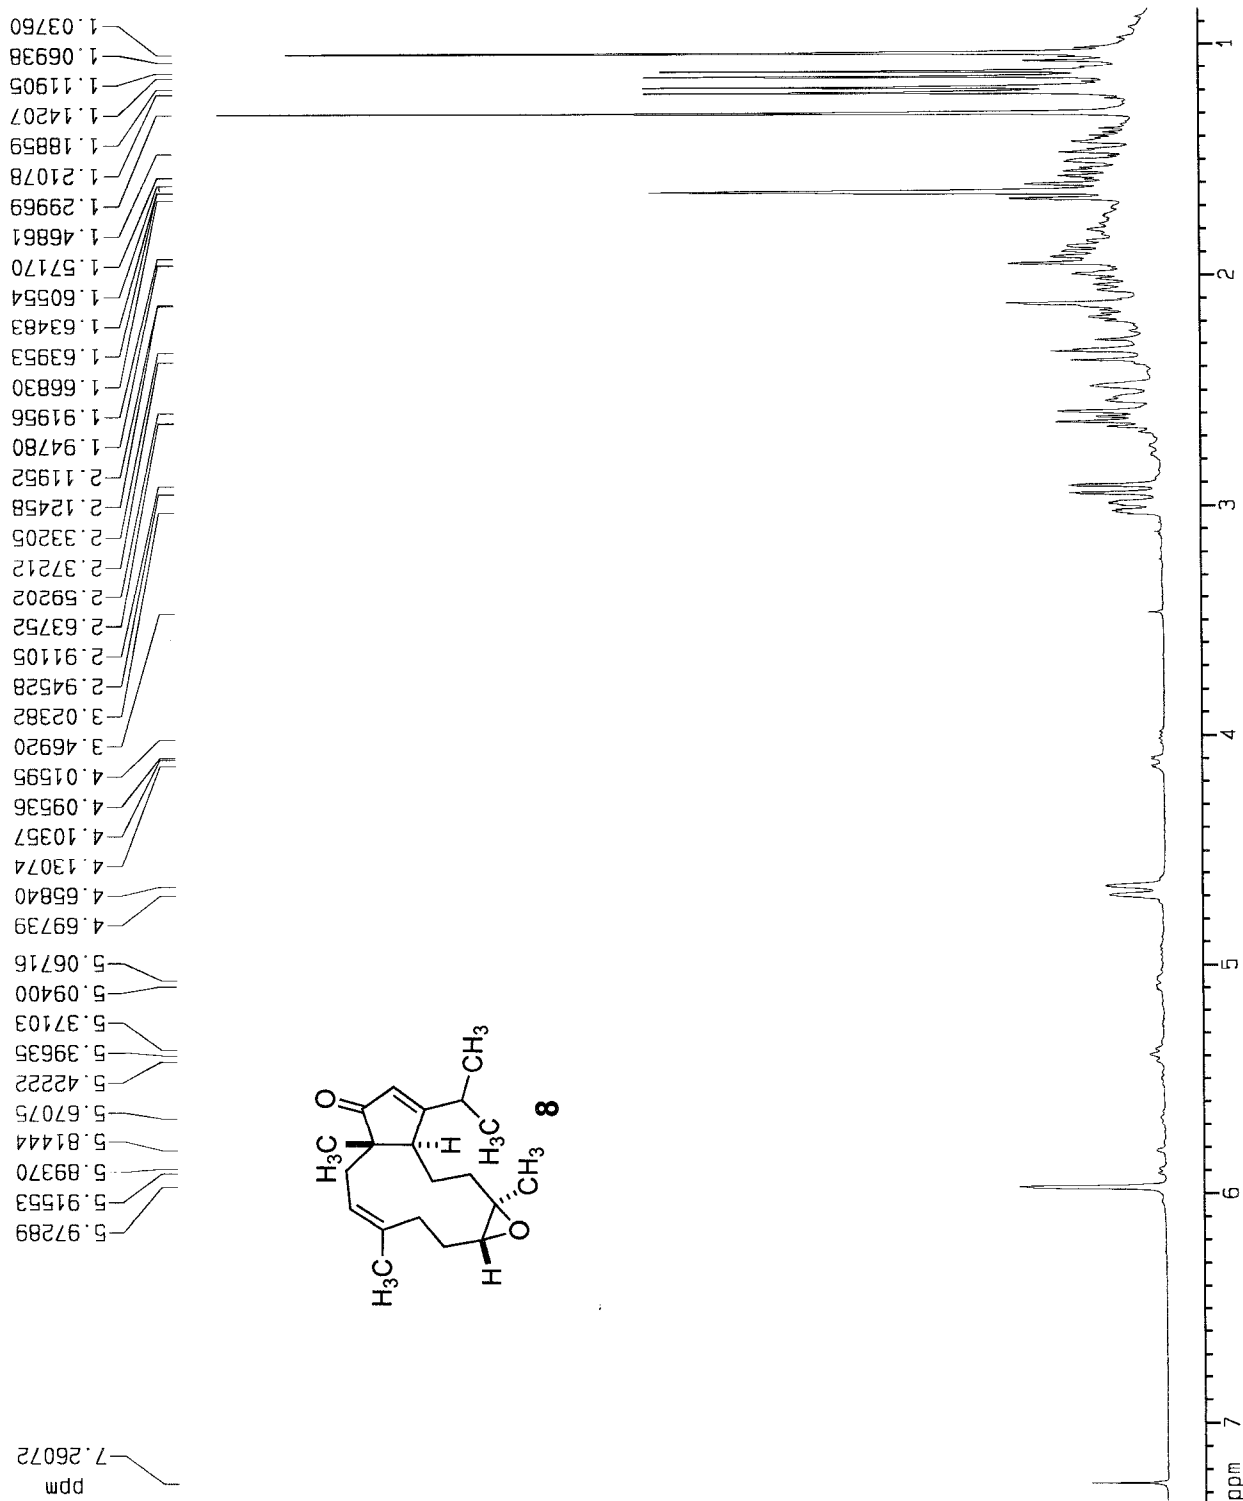



rpar: C13CPD

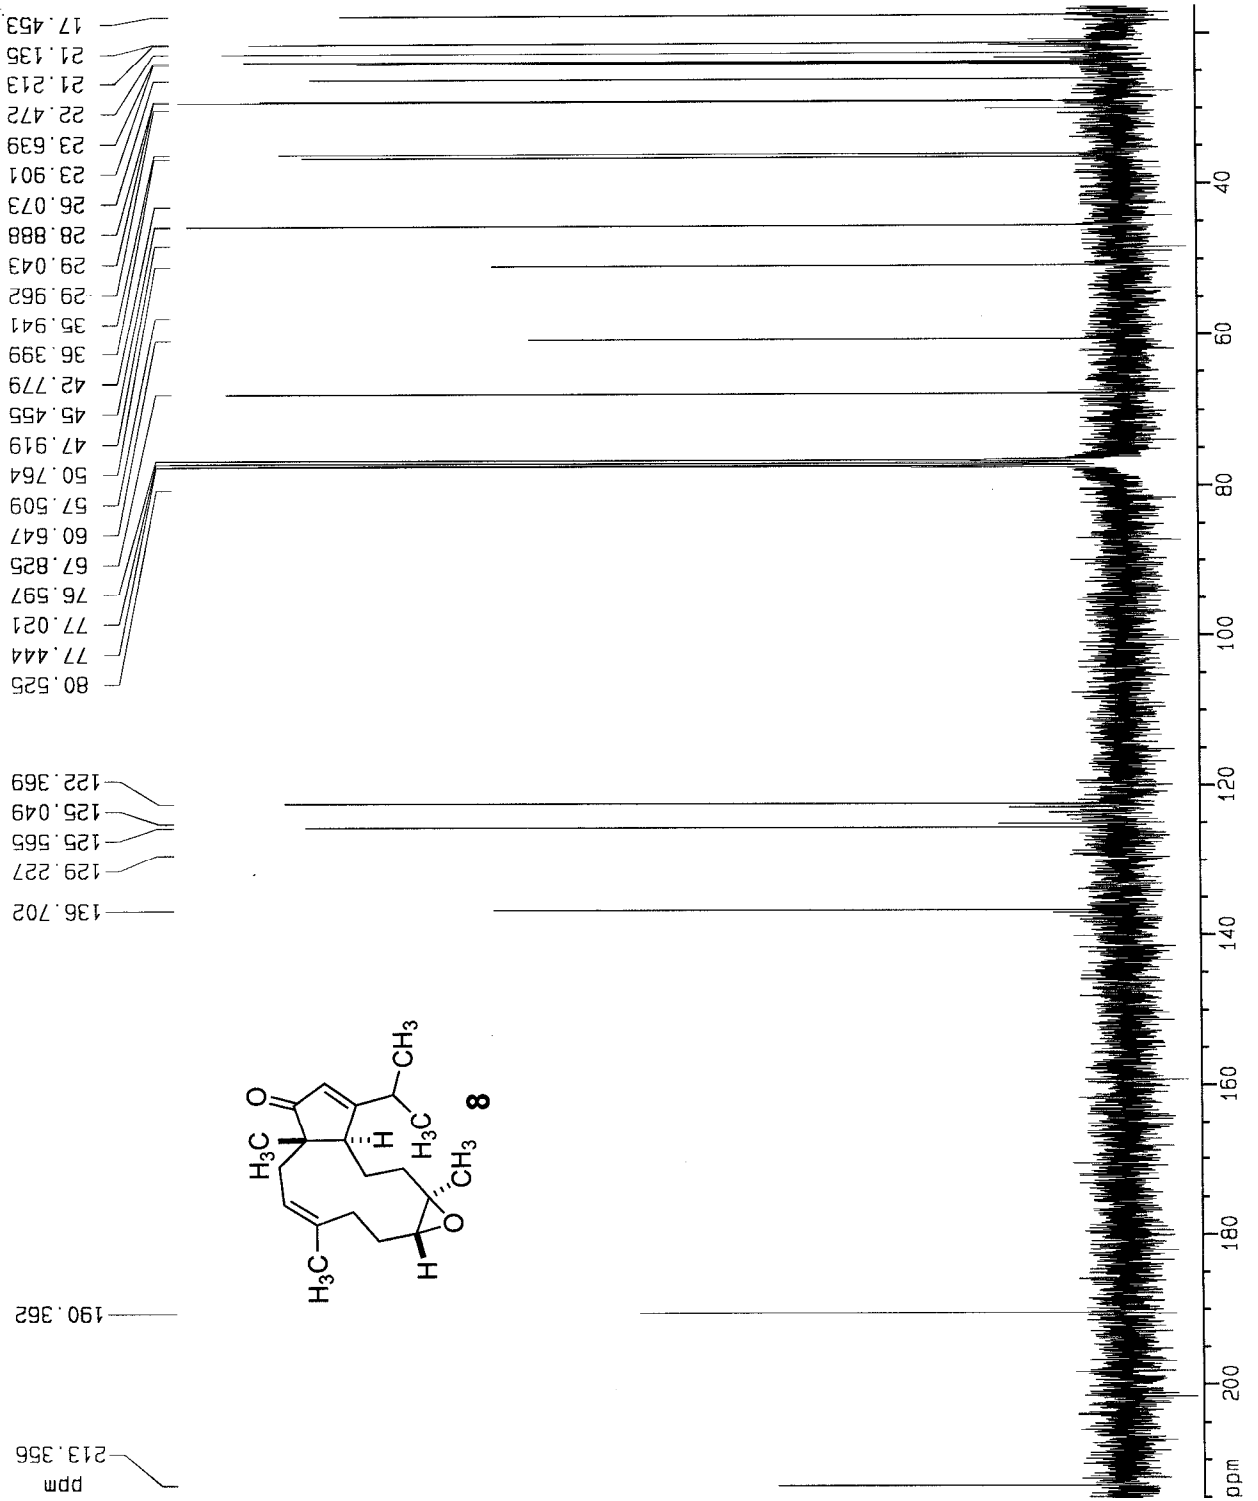

Current Data Parameters  
NAME e25623rn5  
EXPNO 2  
PROCNO 1

F2 - Acquisition Parameters

Date\_ 20021120  
Time 17 01  
INSTRUM dpx300  
PROBHD 5 mm Multinu  
PULPROG zgpg30  
TD 65536  
SOLVENT CDCl3  
NS 673  
DS 2  
SWH 17605.635 Hz  
FIDRES 0.268641 Hz  
AQ 1.8612725 sec  
RG 2298.8  
DM 28.400 usec  
DE 5.00 usec  
TE 300.0 K  
D12 0.0002000 sec  
PL13 17.00 dB  
D1 1.00000000 sec  
CPDPRG2 waltz16  
PCPD2 105.00 usec  
SF02 300.1312005 MHz  
NUC2 <sup>1</sup>H  
PL2 -4.00 dB  
PL12 17.00 dB  
P1 8.00 usec  
DE 5.00 usec  
SF01 75.4756682 MHz  
NUC1 <sup>13</sup>C  
PL1 -2.00 dB  
D11 0.03000000 sec

F2 - Processing parameters

SI 32768  
SF 75.4677510 MHz  
WDW EM  
SSB 0  
LB 1.00 Hz  
GB 0  
PC 1.40

1D NMR plot parameters

CX 20.00 cm  
FIP 215.049 ppm  
F1 16229.27 Hz  
F2P 16.374 ppm  
F2 1235.68 Hz  
PRMCM 9.93377 ppm/cm  
HZCM 749.67914 Hz/cm

Current Data Parameters  
 NAME e296n2rh3  
 EXPNO 1  
 PROCNO 1

F2 - Acquisition Parameters  
 Date\_ 20021114  
 Time 10.05  
 INSTRUM dpx300  
 PROBHD 5 mm Multinu  
 PULPROG zg30  
 TD 32768  
 SOLVENT CDC13  
 NS 16  
 DS 2  
 SWH 4058.442 Hz  
 FIDRES 0.123854 Hz  
 AQ 4.0370674 sec  
 RG 574.7  
 DW 123.200 usec  
 DE 5.00 usec  
 TE 300.0 K  
 D1 1.0000000 sec  
 P1 11.00 usec  
 DE 5.00 usec  
 SF01 300.1315818 MHz  
 NUC1 1H  
 PL1 -4.00 dB

F2 - Processing parameters  
 SI 16384  
 SF 300.1300062 MHz  
 WDW EM  
 SSB 0  
 LB 0.30 Hz  
 GB 0  
 PC 1.00

1D NMR plot parameters  
 CX 20.00 cm  
 F1P 7.984 ppm  
 F1 2216.21 Hz  
 F2P 0.633 ppm  
 F2 249.89 Hz  
 PPMCM 0.32758 ppm/cm  
 HZCM 98.31586 Hz/cm

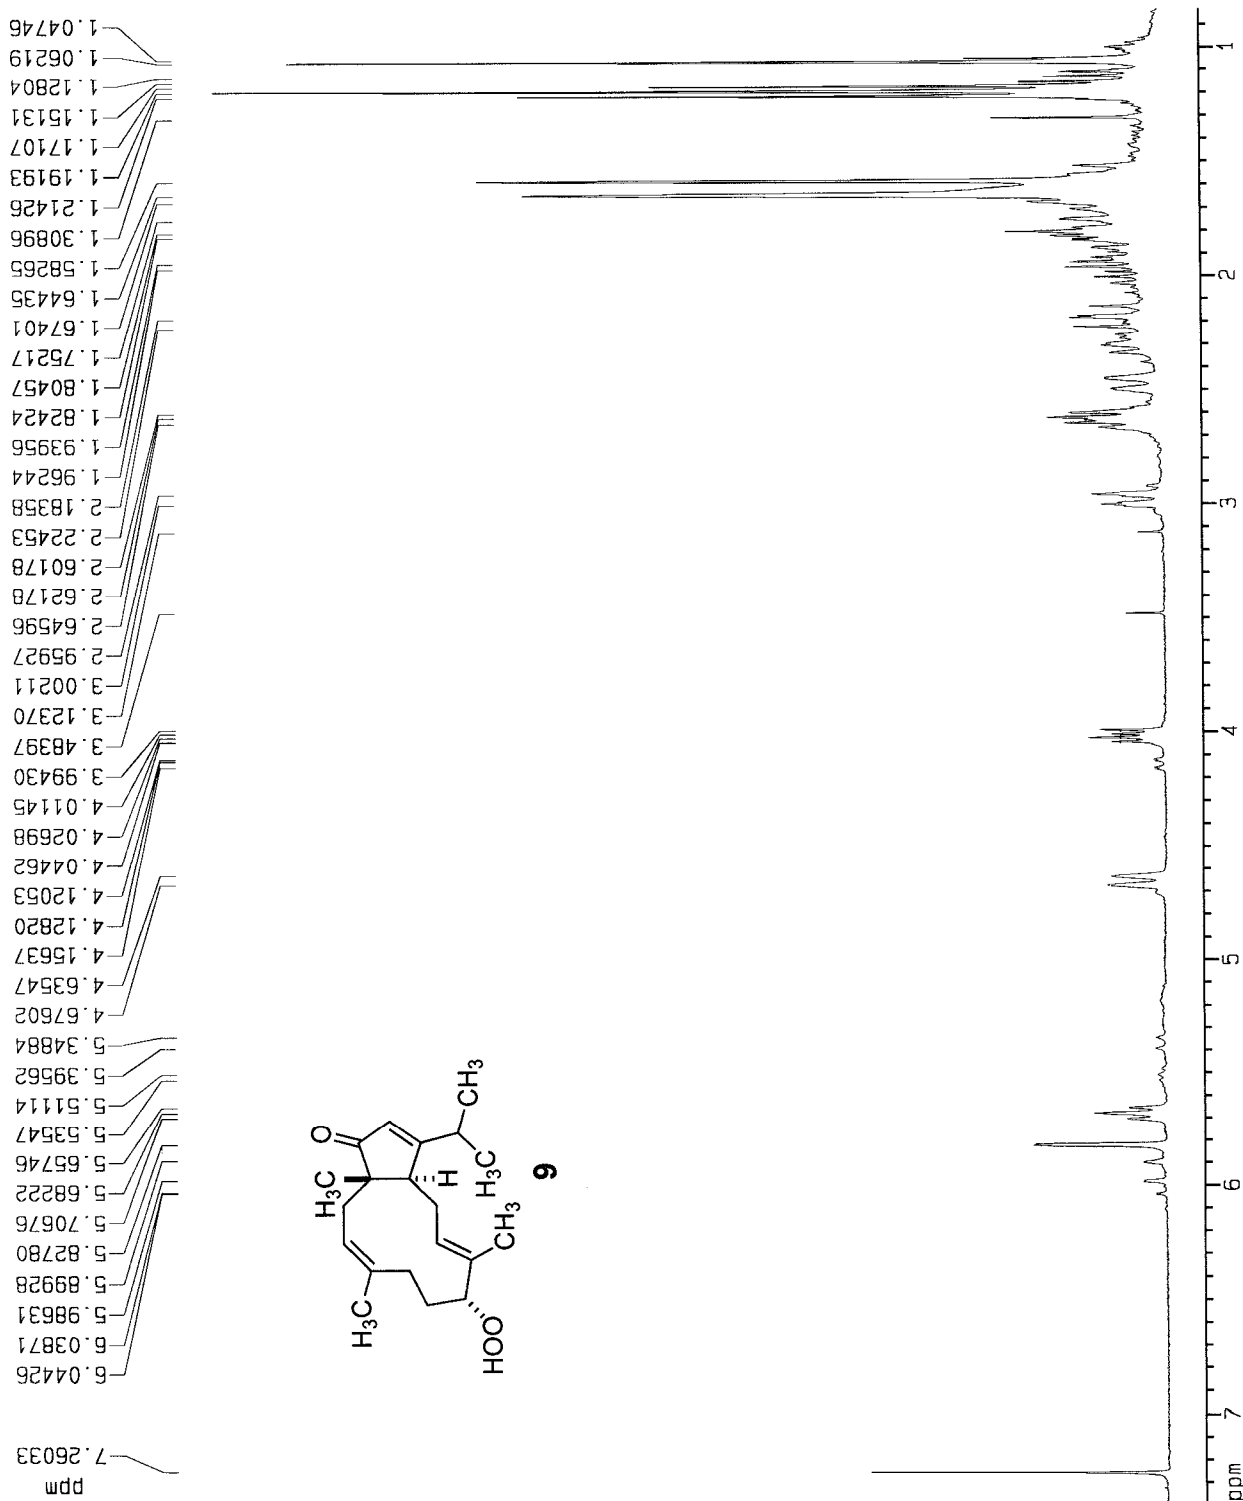

rpar: C13CPD

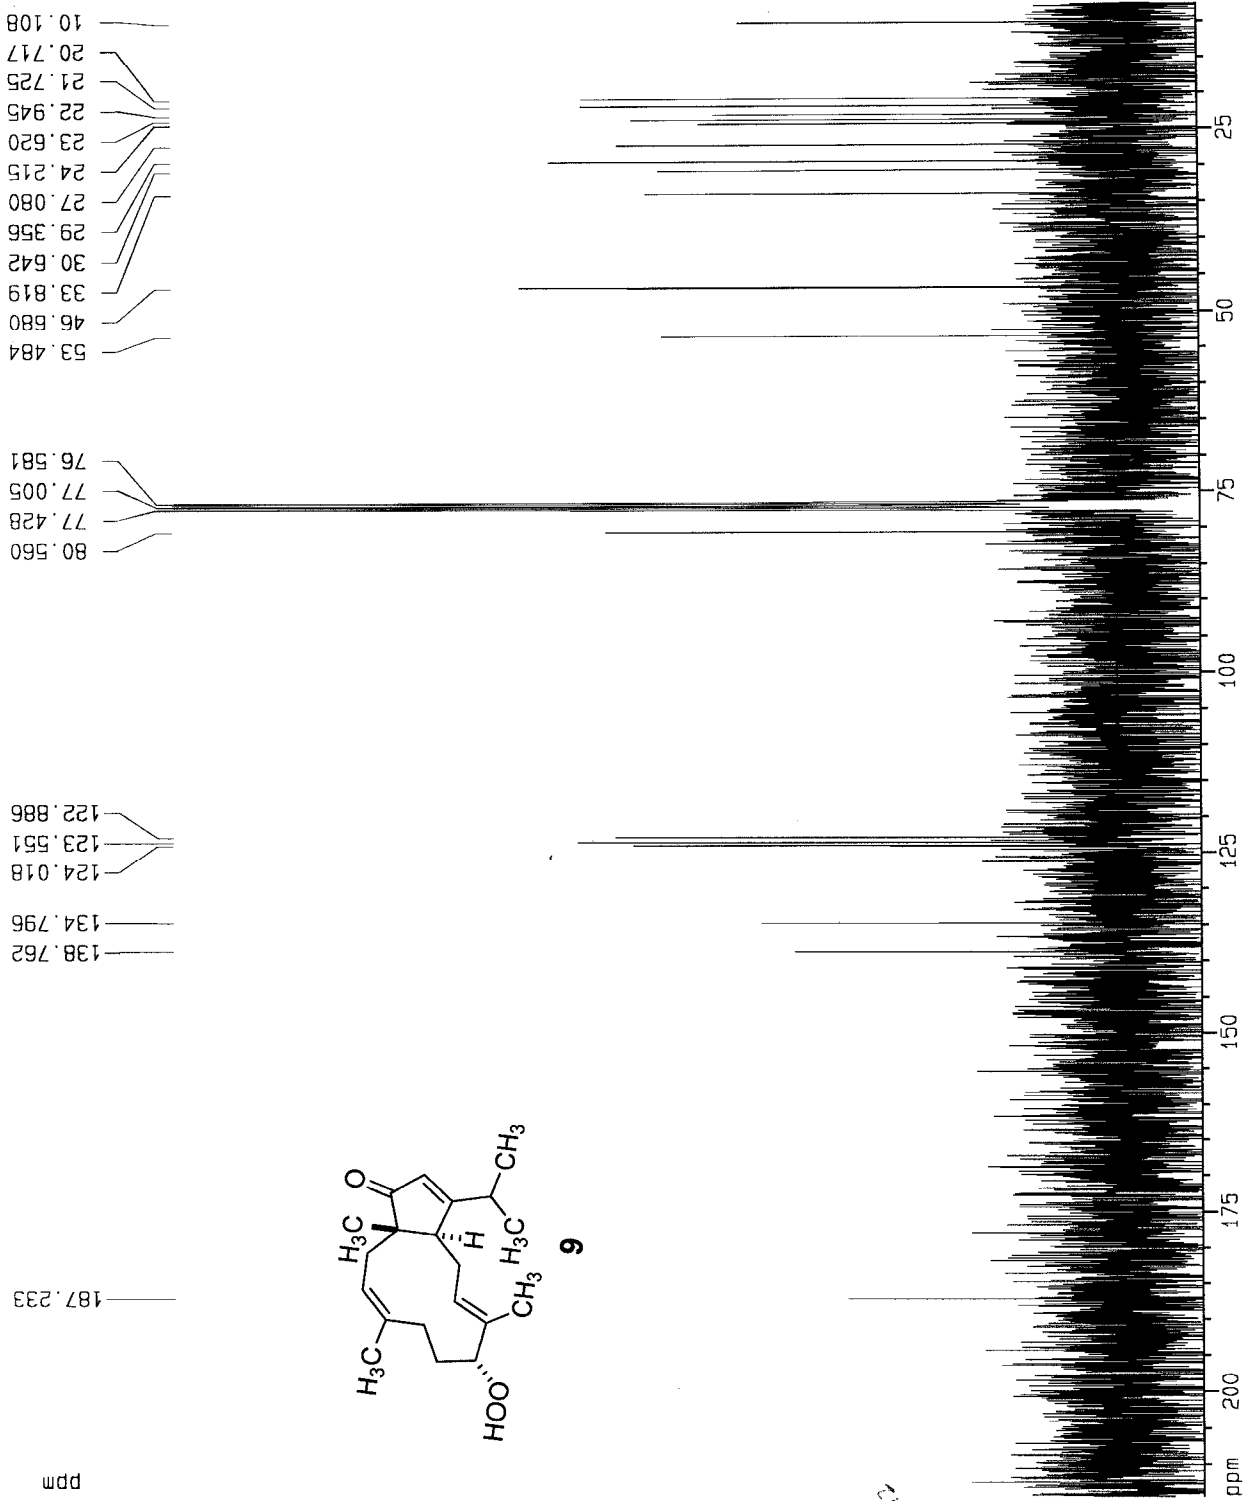

Current Data Parameters  
 NAME e296h2rh3  
 EXPNO 2  
 PROCNO 1

F2 - Acquisition Parameters  
 Date\_ 2002114  
 Time 10.13  
 INSTRUM dpx300  
 PROBHD 5 mm Multinu  
 PULPROG zgpg30  
 TD 65536  
 SOLVENT CDCl3  
 NS 538  
 DS 2  
 SWH 17605.635 Hz  
 FIDRES 0.268641 Hz  
 AQ 1.8612725 sec  
 RG 1149.4  
 DW 28.400 usec  
 DE 5.00 usec  
 TE 300.0 K  
 D12 0.00002000 sec  
 PL13 17.00 dB  
 D1 1.00000000 sec  
 waltz16

CPDPRG2  
 PCPD2 105.00 usec  
 SF02 300.1312005 MHz  
 NUC2 1H  
 PL2 -4.00 dB  
 PL12 17.00 dB  
 P1 8.00 usec  
 DE 5.00 usec  
 SF01 75.4755682 MHz  
 NUC1 13C  
 PL1 -2.00 dB  
 D11 0.03000000 sec

F2 - Processing parameters  
 SI 32768  
 SF 75.4677510 MHz  
 WDW EM  
 SSB 0  
 LB 1.00 Hz  
 GB 0  
 PC 1.40

1D NMR plot parameters  
 CX 20.00 cm  
 F1P 214.335 ppm  
 F1 16175.35 Hz  
 F2P 7.564 ppm  
 F2 570.82 Hz  
 PPMCM 10.33854 ppm/cm  
 HZCM 750.22668 Hz/cm

Current Data Parameters  
 NAME e24h8  
 EXPNO 11  
 PROCNO 1

F2 - Acquisition Parameters  
 Date\_ 20021032  
 Time 8.15  
 INSTRUM dpx300  
 PROBHD 5 mm Multinu  
 PULPROG zg30  
 TD 32768  
 SOLVENT CDC13  
 NS 16  
 DS 2  
 SWH 4058.442 Hz  
 FIDRES 0.123854 Hz  
 AQ 4.0370674 sec  
 RG 1149.4  
 DW 123.200 usec  
 DE 5.00 usec  
 TE 300.0 K  
 D1 1.0000000 sec  
 P1 11.00 usec  
 DE 5.00 usec  
 SF01 300.1315818 MHz  
 NUC1 1H  
 PL1 -4.00 dB

F2 - Processing parameters  
 SI 16384  
 SF 300.1300062 MHz  
 WDW EM  
 SSB 0  
 LB 0.30 Hz  
 GB 0  
 PC 1.00

1D NMR plot parameters  
 CX 20.00 cm  
 F1P 5.873 ppm  
 F1 1762.65 Hz  
 F2P 0.513 ppm  
 F2 153.86 Hz  
 PPMCM 0.26802 ppm/cm  
 HZCM 80.43977 Hz/cm

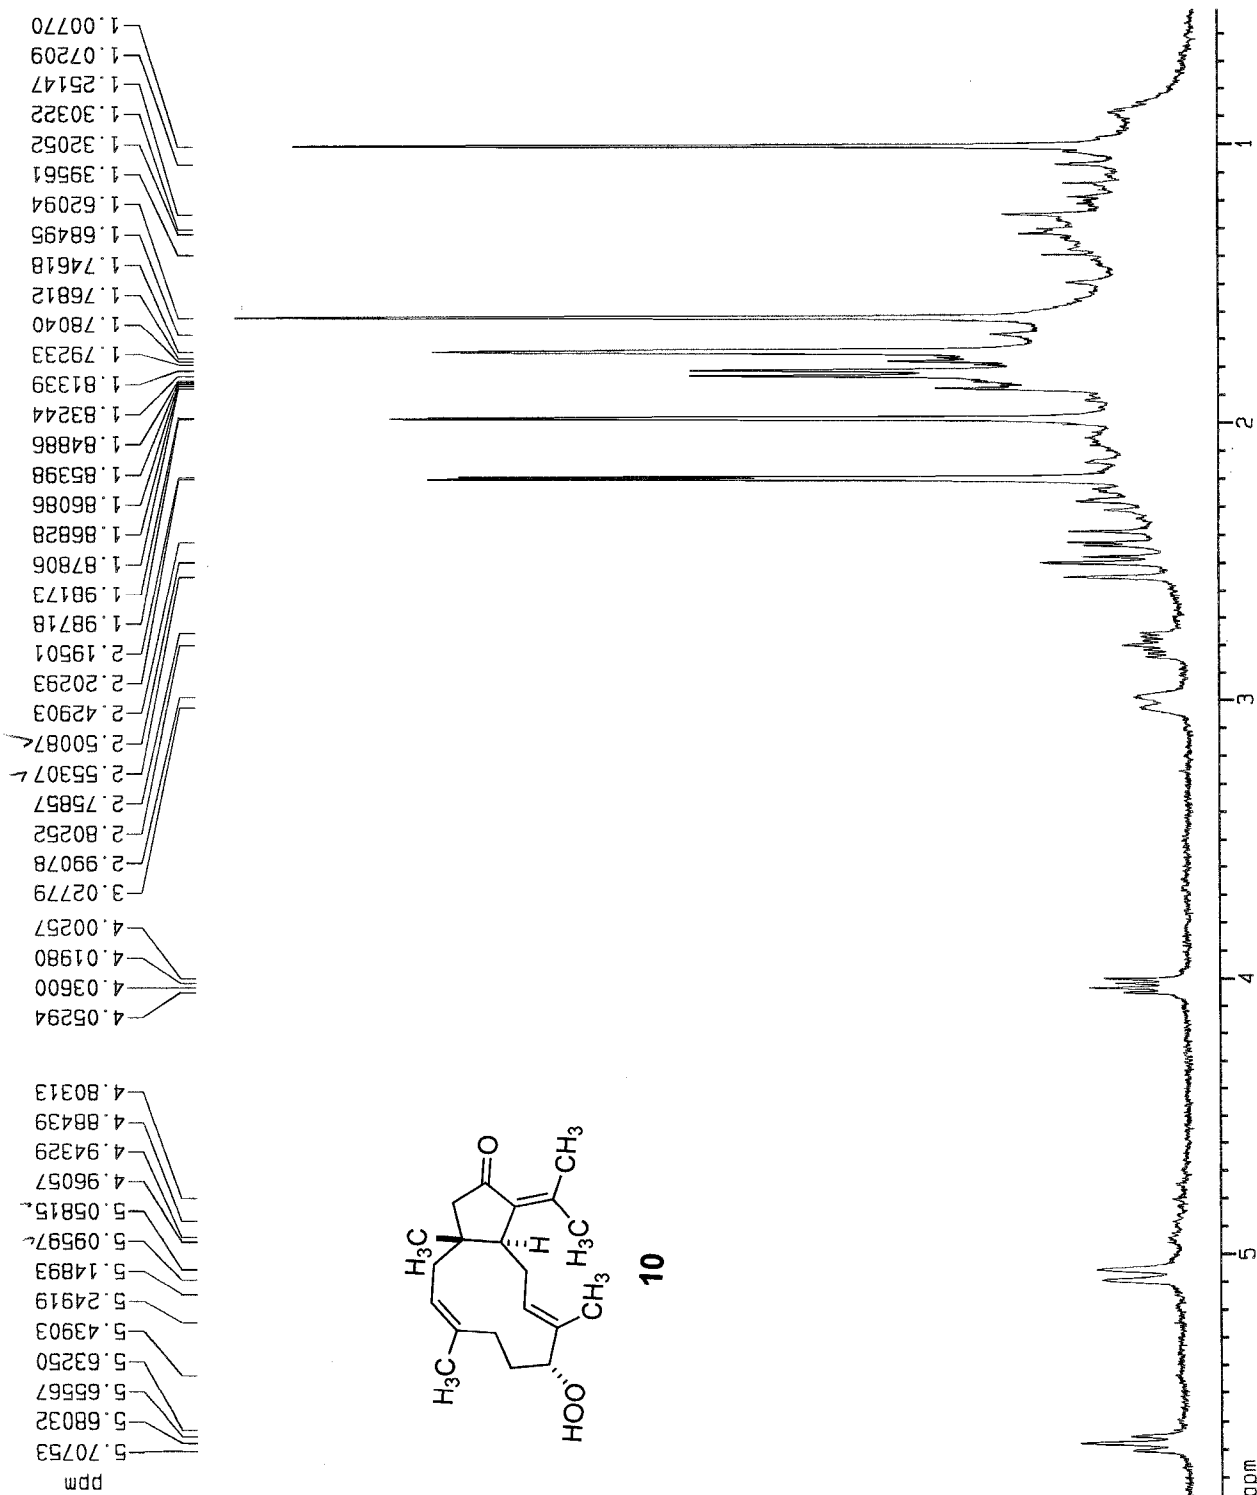

Current Data Parameters

NAME e24n6  
EXPNO 4  
PROCNO 1

F2 - Acquisition Parameters

Date\_ 20021022  
Time 8:21  
INSTRUM gpx300  
PROBHD 5 mm Multinu  
PULPROG cosy45  
TD 1024  
SOLVENT CDCl3  
NS 16  
DS 16  
SWH 4068.442 Hz  
FIDRES 3.963322 Hz  
AQ 0.1262066 sec  
RG 512  
DM 123.200 usec  
DE 5.00 usec  
TE 300.0 K  
D1 1.0000000 sec  
P1 11.00 usec  
D0 0.0000000 sec  
DE 5.00 usec  
SFO1 300.1315618 MHz  
NUC1 1H  
PL1 -4.00 dB  
IN0 0.00024640 sec

F1 - Acquisition parameters

NUC0 13C  
TD 256  
SFO1 300.1316 MHz  
FIDRES 15.853278 Hz  
SW 13.522 ppm

F2 - Processing parameters

SI 512  
SF 300.1300062 MHz  
WDW SINE  
SSB 0  
LB 0.00 Hz  
GB 0  
PC 1.00

F1 - Processing parameters

SI 512  
MC2 OF  
SF 300.1300062 MHz  
WDW SINE  
SSB 0  
LB 0.00 Hz  
GB 0

2D NMR plot parameters

CX2 15.00 cm  
CX1 15.00 cm  
F2PLO 5.804 ppm  
F2LO 1741.99 Hz  
F2PH1 0.760 ppm  
F2PH2 228.00 Hz  
F1PLO 5.821 ppm  
F1LO 1749.99 Hz  
F1PH1 0.733 ppm  
F1PH2 220.11 Hz  
F2PACM 0.33630 ppm/cm  
F2HZCM 100.93259 Hz/cm  
F1PACM 0.33982 ppm/cm  
F1HZCM 104.08043 Hz/cm

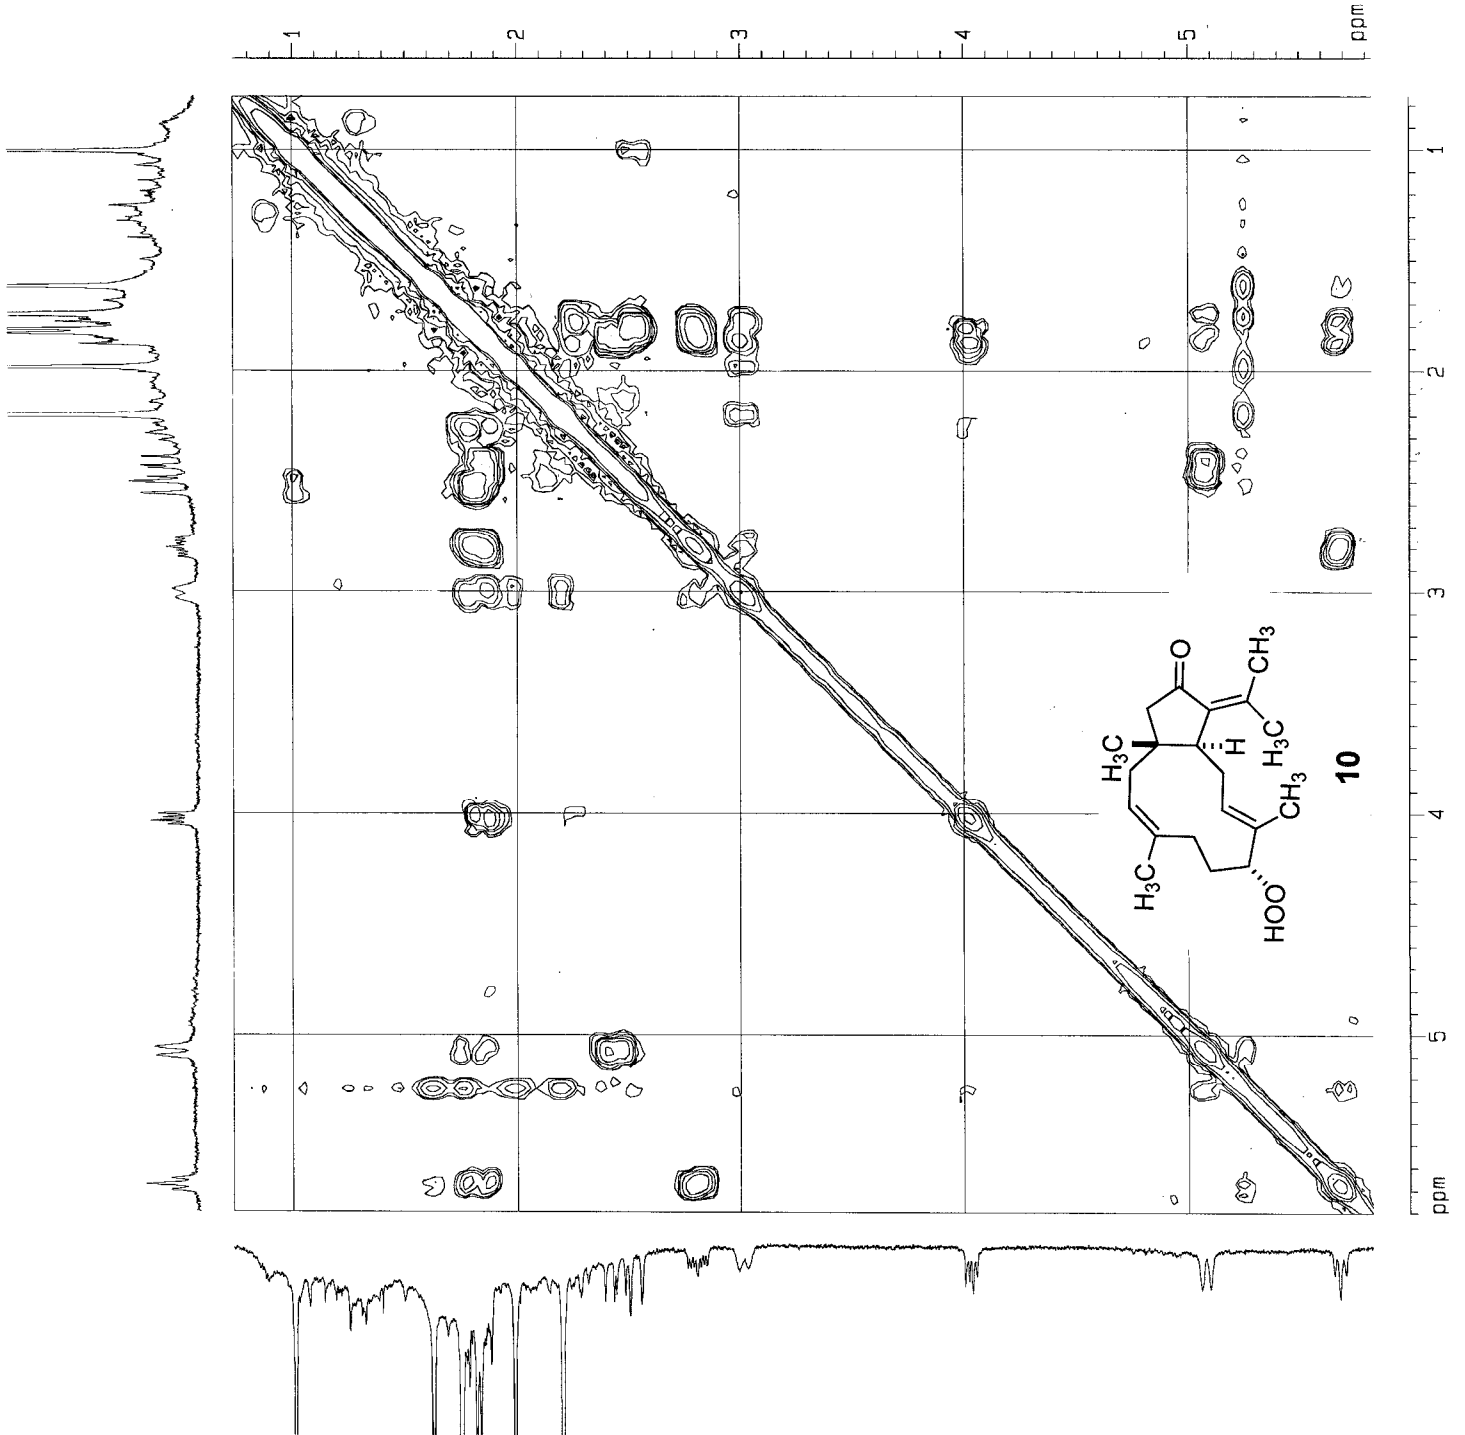

*Eunicea* sp. 2

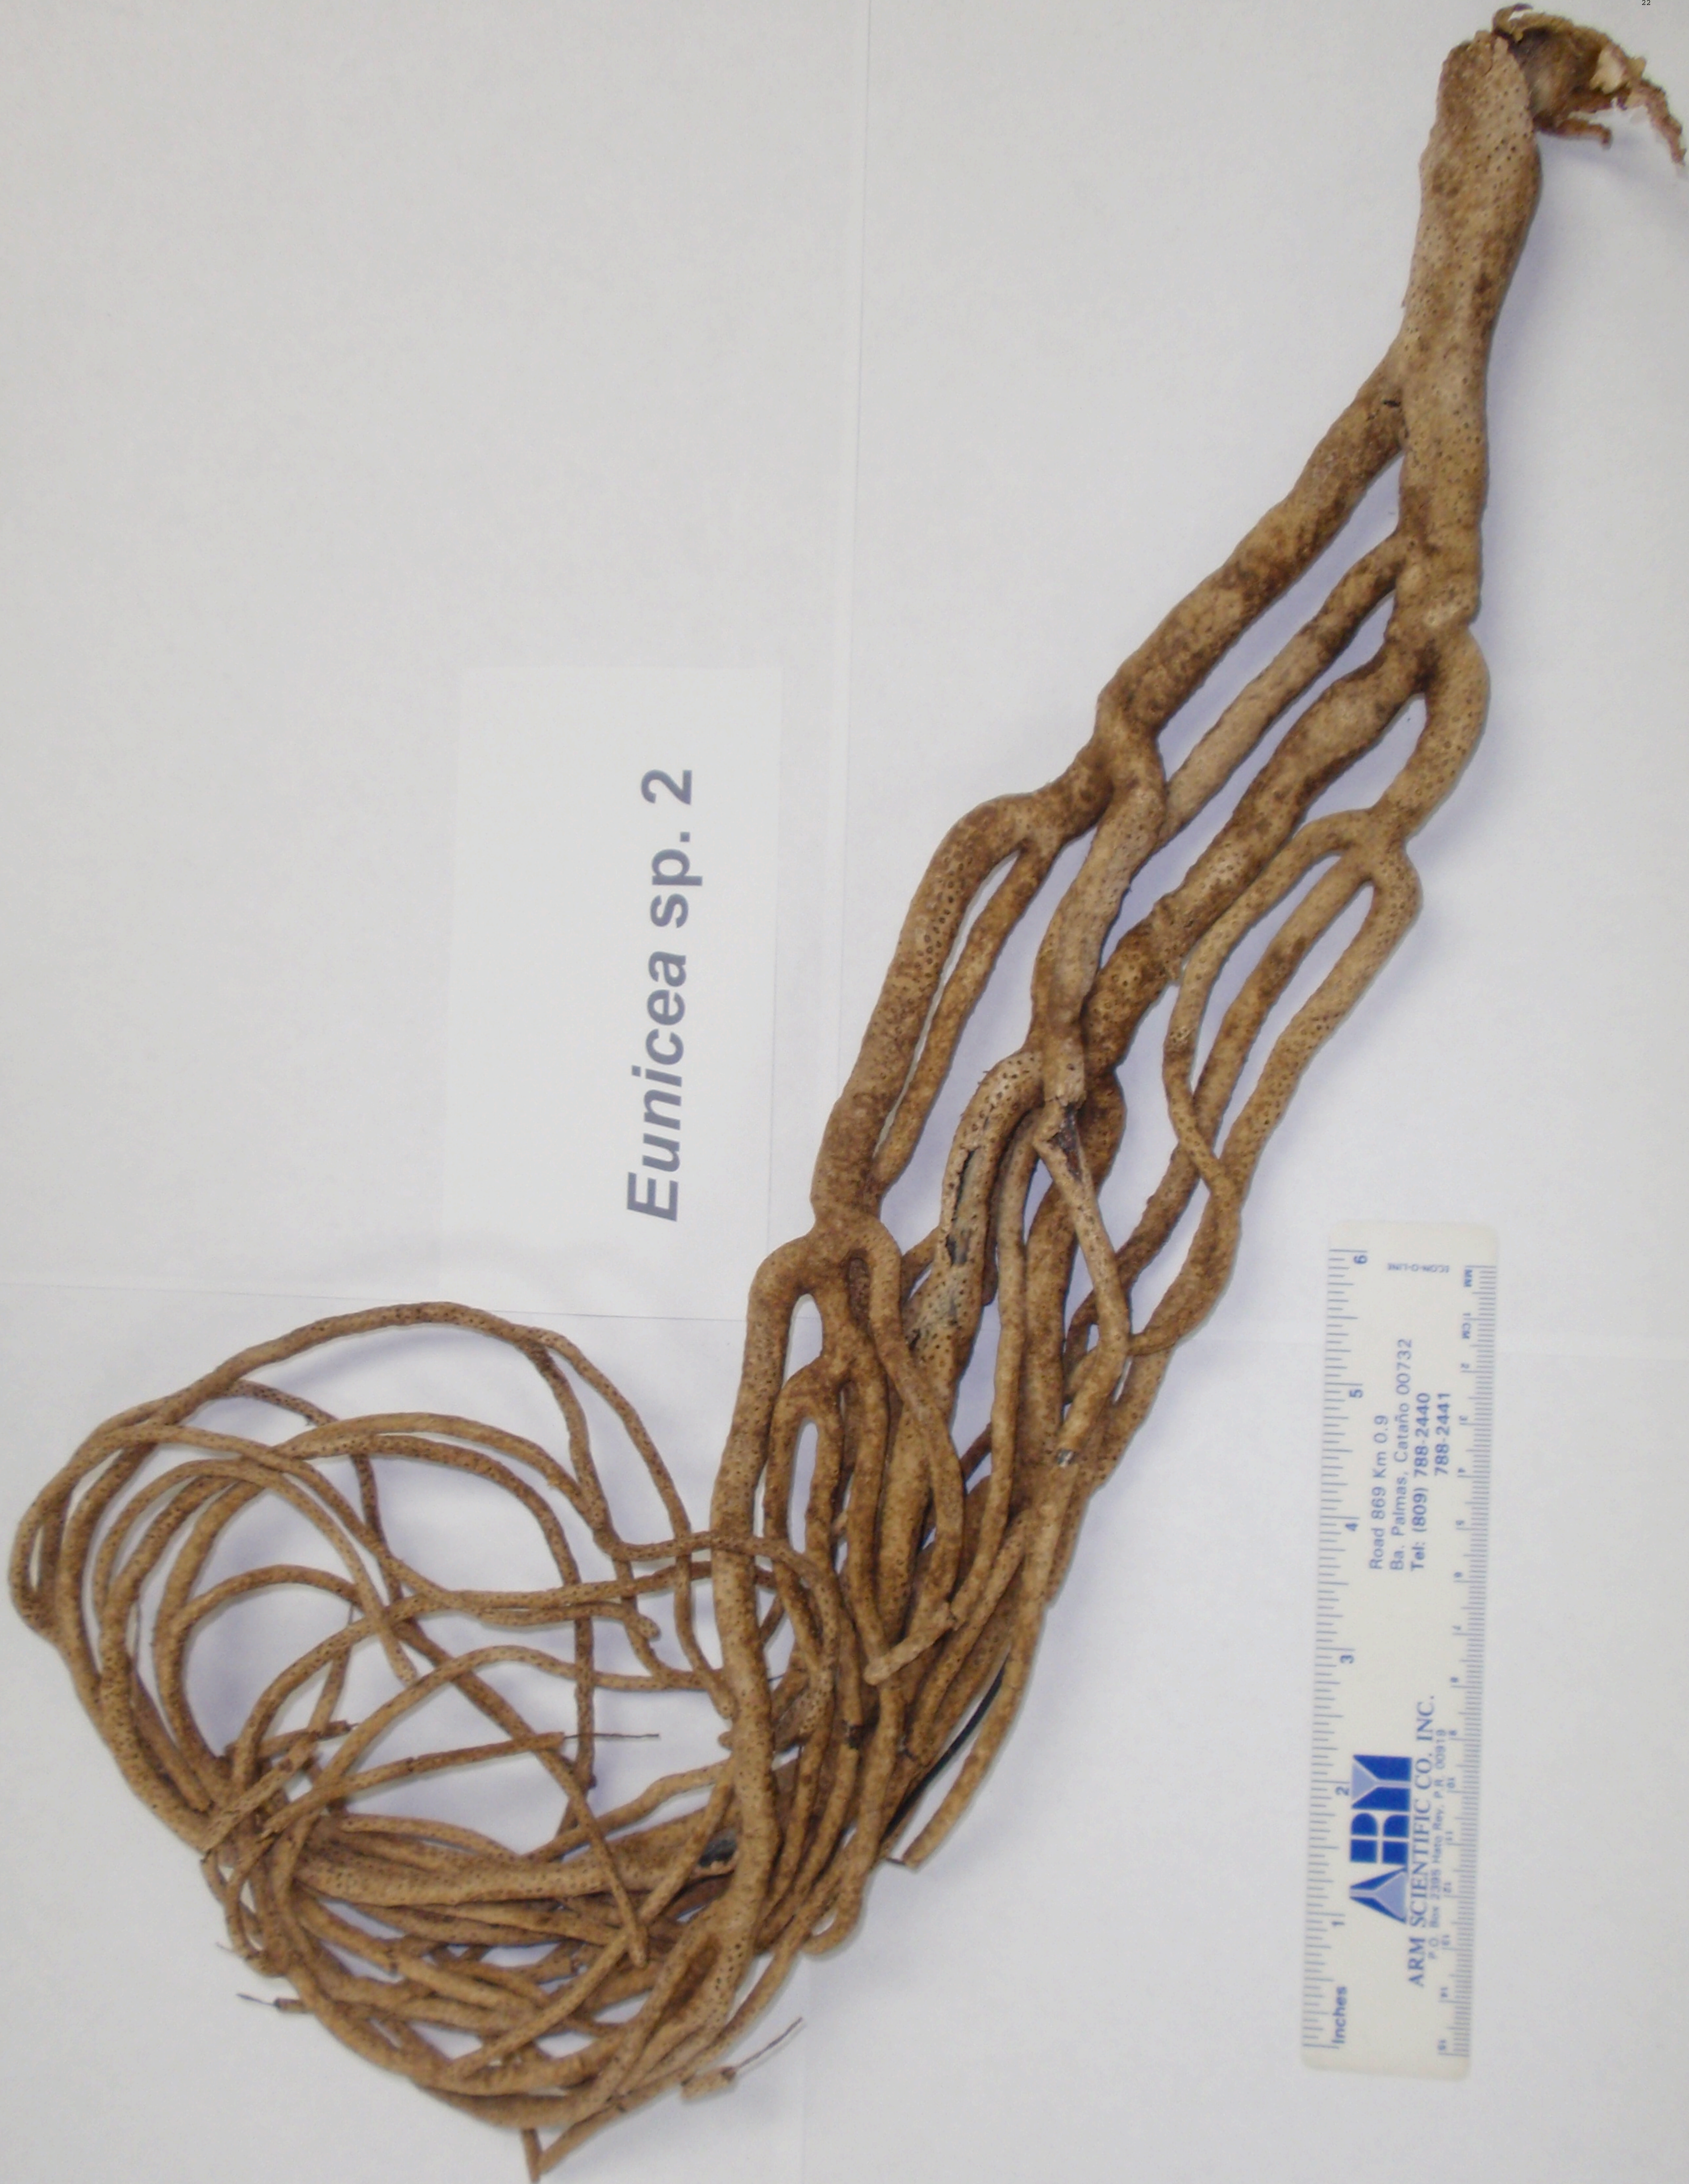

Inches 1 2 3 4 5 6  
ARM SCIENTIFIC CO., INC.  
P.O. Box 2385 Hato Rey, P.R. 00919  
Road 869 Km 0.9  
Ba. Palmas, Cataño 00732  
Tel: (809) 788-2440 788-2441  
ECON-O-LINE
